# Supplementary material for: Integration of machine learning in 3D-QSAR CoMSIA models for the identification of lipid antioxidant peptides
Source: Royal Society of Chemistry journal article supplement (doi:10.1039/d3ra06690h), 2023-01-01
Supplement: d3ra06690h2.pdf [file d3ra06690h2.pdf]

## Supplementary 1

**Table S1.1.** Train and Test sets\_ Seed 1

| No. | Ligand Name | QSAR Set | Activity | No. | Ligand Name | QSAR Set | Activity |
|-----|-------------|----------|----------|-----|-------------|----------|----------|
| 1   | 2.LHD       | training | 3.593    | 41  | 49.PHR      | training | 4.751    |
| 2   | 3.LHE       | training | 6.136    | 42  | 50.PHS      | training | 4.042    |
| 3   | 4.LHF       | training | 3.628    | 43  | 51.PHT      | training | 6.247    |
| 4   | 6.LHH       | training | 4.836    | 44  | 52.PHV      | training | 3.335    |
| 5   | 7.LHI       | training | 6.531    | 45  | 53.PHW      | training | 6.535    |
| 6   | 8.LHK       | training | 4.225    | 46  | 54.PHY      | training | 4.227    |
| 7   | 9.LHL       | training | 5.920    | 47  | 57.PWE      | training | 1.096    |
| 8   | 11.LHN      | training | 5.148    | 48  | 58.PWF      | training | 0.919    |
| 9   | 13.LHR      | training | 5.184    | 49  | 59.PWG      | training | 2.687    |
| 10  | 14.LHS      | training | 4.293    | 50  | 61.PWI      | training | 1.396    |
| 11  | 16.LHV      | training | 3.481    | 51  | 63.PWL      | training | 1.096    |
| 12  | 17.LHW      | training | 6.791    | 52  | 64.PWM      | training | 0.796    |
| 13  | 18.LHY      | training | 4.203    | 53  | 65.PWN      | training | 2.104    |
| 14  | 19.LWA      | training | 1.192    | 54  | 66.PWQ      | training | 1.202    |
| 15  | 20.LWD      | training | 1.717    | 55  | 67.PWR      | training | 2.705    |
| 16  | 21.LWE      | training | 1.717    | 56  | 68.PWS      | training | 1.096    |
| 17  | 22.LWF      | training | 1.414    | 57  | 70.PWV      | training | 1.008    |
| 18  | 24.LWH      | training | 3.212    | 58  | 71.PWW      | training | 2.899    |
| 19  | 25.LWI      | training | 1.111    | 59  | 72.PWY      | training | 1.114    |
| 20  | 26.LWK      | training | 1.899    | 60  | 73.RHA      | training | 5.205    |
| 21  | 27.LWL      | training | 0.606    | 61  | 74.RHD      | training | 3.304    |
| 22  | 28.LWM      | training | 1.394    | 62  | 75.RHE      | training | 5.096    |
| 23  | 29.LWN      | training | 1.313    | 63  | 76.RHF      | training | 3.300    |
| 24  | 30.LWQ      | training | 2.505    | 64  | 77.RHG      | training | 5.725    |
| 25  | 31.LWR      | training | 2.909    | 65  | 78.RHH      | training | 3.296    |
| 26  | 32.LWS      | training | 2.020    | 66  | 79.RHI      | training | 4.806    |
| 27  | 33.LWT      | training | 2.020    | 67  | 80.RHK      | training | 2.694    |
| 28  | 34.LWV      | training | 1.616    | 68  | 81.RHL      | training | 3.501    |
| 29  | 35.LWW      | training | 3.515    | 69  | 82.RHM      | training | 3.218    |
| 30  | 36.LWY      | training | 2.222    | 70  | 83.RHN      | training | 5.713    |
| 31  | 37.PHA      | training | 5.793    | 71  | 84.RHQ      | training | 3.108    |
| 32  | 38.PHD      | training | 4.622    | 72  | 85.RHR      | training | 4.302    |
| 33  | 39.PHE      | training | 6.152    | 73  | 86.RHS      | training | 3.386    |
| 34  | 40.PHF      | training | 3.916    | 74  | 87.RHT      | training | 5.987    |
| 35  | 42.PHH      | training | 6.051    | 75  | 88.RHV      | training | 3.206    |
| 36  | 43.PHI      | training | 4.916    | 76  | 89.RHW      | training | 5.878    |
| 37  | 44.PHK      | training | 3.426    | 77  | 91.RWA      | training | 1.212    |
| 38  | 45.PHL      | training | 5.311    | 78  | 92.RWD      | training | 0.909    |
| 39  | 46.PHM      | training | 3.714    | 79  | 93.RWE      | training | 1.091    |
| 40  | 48.PHQ      | training | 3.718    | 80  | 94.RWF      | training | 0.909    |

| No. | Ligand Name | QSAR Set | Activity | No. | Ligand Name | QSAR Set | Activity |
|-----|-------------|----------|----------|-----|-------------|----------|----------|
| 81  | 95.RWG      | training | 1.717    | 121 | 162.EYY     | training | 3.417    |
| 82  | 96.RWH      | training | 1.091    | 122 | 163.HYY     | training | 2.257    |
| 83  | 97.RWI      | training | 1.232    | 123 | 164.KYY     | training | 2.257    |
| 84  | 98.RWK      | training | 0.606    | 124 | 165.RYY     | training | 2.257    |
| 85  | 101.RWN     | training | 2.404    | 125 | 166.AYY     | training | 3.071    |
| 86  | 102.RWQ     | training | 0.606    | 126 | 169.FYY     | training | 1.911    |
| 87  | 103.RWR     | training | 2.384    | 127 | 172.GYY     | training | 5.071    |
| 88  | 105.RWT     | training | 3.818    | 128 | 174.QYY     | training | 5.071    |
| 89  | 106.RWV     | training | 0.606    | 129 | 175.MYY     | training | 1.991    |
| 90  | 108.RWY     | training | 0.808    | 130 | 176.SYY     | training | 3.070    |
| 91  | 110.EHH     | training | 0.905    | 131 | 177.TYY     | training | 3.070    |
| 92  | 114.IHH     | training | 2.020    | 132 | 178.CYY     | training | 0.470    |
| 93  | 115.FHH     | training | 1.803    | 133 | 179.YDY     | training | 3.047    |
| 94  | 117.YHH     | training | 1.803    | 134 | 180.YEY     | training | 3.047    |
| 95  | 118.GHH     | training | 1.089    | 135 | 181.YHY     | training | 9.886    |
| 96  | 119.NHH     | training | 1.089    | 136 | 182.YKY     | training | 9.886    |
| 97  | 120.QHH     | training | 1.089    | 137 | 185.YIY     | training | 3.607    |
| 98  | 121.MHH     | training | 2.015    | 138 | 186.YLY     | training | 3.607    |
| 99  | 122.SHH     | training | 1.320    | 139 | 187.YFY     | training | 2.233    |
| 100 | 123.THH     | training | 1.320    | 140 | 190.YGY     | training | 3.366    |
| 101 | 125.HDH     | training | 1.477    | 141 | 191.YNY     | training | 3.366    |
| 102 | 130.HAH     | training | 0.952    | 142 | 192.YQY     | training | 3.366    |
| 103 | 131.HIH     | training | 0.952    | 143 | 193.YMY     | training | 1.780    |
| 104 | 134.HWH     | training | 2.026    | 144 | 195.YTY     | training | 3.447    |
| 105 | 135.HYH     | training | 2.026    | 145 | 196.YCY     | training | 3.087    |
| 106 | 136.HGH     | training | 0.832    | 146 | 197.YYD     | training | 4.116    |
| 107 | 137.HNH     | training | 0.832    | 147 | 198.YYE     | training | 4.116    |
| 108 | 138.HQH     | training | 0.832    | 148 | 199.YYH     | training | 5.303    |
| 109 | 139.HMH     | training | 0.873    | 149 | 201.YYR     | training | 5.303    |
| 110 | 140.HSH     | training | 0.730    | 150 | 202.YYA     | training | 3.344    |
| 111 | 141.HTH     | training | 0.730    | 151 | 204.YYL     | training | 3.344    |
| 112 | 142.HCH     | training | 0.975    | 152 | 205.YYF     | training | 4.050    |
| 113 | 143.HHD     | training | 0.188    | 153 | 206.YYW     | training | 4.050    |
| 114 | 151.HHF     | training | 3.612    | 154 | 208.YYG     | training | 2.996    |
| 115 | 153.HHY     | training | 3.612    | 155 | 209.YYN     | training | 2.996    |
| 116 | 154.HHG     | training | 0.317    | 156 | 211.YYM     | training | 2.103    |
| 117 | 155.HHN     | training | 0.317    | 157 | 213.YYT     | training | 3.983    |
| 118 | 156.HHQ     | training | 0.317    | 158 | 214.YYC     | training | 0.637    |
| 119 | 160.HHC     | training | 0.128    |     |             |          |          |
| 120 | 161.DYY     | training | 3.417    |     |             |          |          |

| No. | Ligand Name | QSAR Set | Activity |
|-----|-------------|----------|----------|
| 159 | 1.LHA       | test     | 3.918    |
| 160 | 5.LHG       | test     | 6.697    |
| 161 | 10.LHM      | test     | 4.504    |
| 162 | 12.LHQ      | test     | 4.136    |
| 163 | 15.LHT      | test     | 5.584    |
| 164 | 23.LWG      | test     | 1.313    |
| 165 | 41.PHG      | test     | 5.197    |
| 166 | 47.PHN      | test     | 6.061    |
| 167 | 55.PWA      | test     | 1.396    |
| 168 | 56.PWD      | test     | 1.096    |
| 169 | 60.PWH      | test     | 1.184    |
| 170 | 62.PWK      | test     | 0.407    |
| 171 | 69.PWT      | test     | 2.598    |
| 172 | 90.RHY      | test     | 3.378    |
| 173 | 99.RWL      | test     | 3.212    |
| 174 | 100.RWM     | test     | 0.727    |
| 175 | 104.RWS     | test     | 0.808    |
| 176 | 107.RWW     | test     | 2.707    |
| 177 | 109.DHH     | test     | 0.905    |
| 178 | 113.AHH     | test     | 2.020    |
| 179 | 116.WHH     | test     | 1.803    |
| 180 | 124.CHH     | test     | 0.937    |
| 181 | 126.HEH     | test     | 1.477    |
| 182 | 132.HLH     | test     | 0.952    |
| 183 | 133.HFH     | test     | 2.026    |
| 184 | 144.HHE     | test     | 0.188    |
| 185 | 152.HHW     | test     | 3.612    |
| 186 | 167.IYY     | test     | 3.071    |
| 187 | 168.LYY     | test     | 3.071    |
| 188 | 170.WYY     | test     | 1.911    |
| 189 | 173.NYY     | test     | 5.071    |
| 190 | 183_YRY     | test     | 9.886    |
| 191 | 184.YAY     | test     | 3.607    |
| 192 | 188.YWY     | test     | 2.233    |
| 193 | 194.YSY     | test     | 3.447    |
| 194 | 200.YYK     | test     | 5.303    |
| 195 | 203.YYI     | test     | 3.344    |
| 196 | 210.YYQ     | test     | 2.996    |
| 197 | 212.YYS     | test     | 3.983    |

**Table S1.2.** Train and Test sets\_ Seed 2

| No | Ligand Name | QSAR Set | Activity | No | Ligand Name | QSAR Set | Activity |
|----|-------------|----------|----------|----|-------------|----------|----------|
| 1  | 1.LHA       | training | 3.918    | 41 | 51.PHT      | training | 6.247    |
| 2  | 2.LHD       | training | 3.593    | 42 | 52.PHV      | training | 3.335    |
| 3  | 3.LHE       | training | 6.136    | 43 | 53.PHW      | training | 6.535    |
| 4  | 4.LHF       | training | 3.628    | 44 | 54.PHY      | training | 4.227    |
| 5  | 5.LHG       | training | 6.697    | 45 | 55.PWA      | training | 1.396    |
| 6  | 6.LHH       | training | 4.836    | 46 | 56.PWD      | training | 1.096    |
| 7  | 7.LHI       | training | 6.531    | 47 | 58.PWF      | training | 0.919    |
| 8  | 8.LHK       | training | 4.225    | 48 | 60.PWH      | training | 1.184    |
| 9  | 9.LHL       | training | 5.920    | 49 | 62.PWK      | training | 0.407    |
| 10 | 10.LHM      | training | 4.504    | 50 | 63.PWL      | training | 1.096    |
| 11 | 11.LHN      | training | 5.148    | 51 | 64.PWM      | training | 0.796    |
| 12 | 12.LHQ      | training | 4.136    | 52 | 65.PWN      | training | 2.104    |
| 13 | 13.LHR      | training | 5.184    | 53 | 66.PWQ      | training | 1.202    |
| 14 | 15.LHT      | training | 5.584    | 54 | 67.PWR      | training | 2.705    |
| 15 | 16.LHV      | training | 3.481    | 55 | 68.PWS      | training | 1.096    |
| 16 | 18.LHY      | training | 4.203    | 56 | 69.PWT      | training | 2.598    |
| 17 | 20.LWD      | training | 1.717    | 57 | 70.PWV      | training | 1.008    |
| 18 | 22.LWF      | training | 1.414    | 58 | 72.PWY      | training | 1.114    |
| 19 | 23.LWG      | training | 1.313    | 59 | 73.RHA      | training | 5.205    |
| 20 | 24.LWH      | training | 3.212    | 60 | 74.RHD      | training | 3.304    |
| 21 | 25.LWI      | training | 1.111    | 61 | 76.RHF      | training | 3.300    |
| 22 | 26.LWK      | training | 1.899    | 62 | 77.RHG      | training | 5.725    |
| 23 | 27.LWL      | training | 0.606    | 63 | 80.RHK      | training | 2.694    |
| 24 | 28.LWM      | training | 1.394    | 64 | 81.RHL      | training | 3.501    |
| 25 | 29.LWN      | training | 1.313    | 65 | 82.RHM      | training | 3.218    |
| 26 | 30.LWQ      | training | 2.505    | 66 | 83.RHN      | training | 5.713    |
| 27 | 31.LWR      | training | 2.909    | 67 | 85.RHR      | training | 4.302    |
| 28 | 32.LWS      | training | 2.020    | 68 | 86.RHS      | training | 3.386    |
| 29 | 33.LWT      | training | 2.020    | 69 | 87.RHT      | training | 5.987    |
| 30 | 34.LWV      | training | 1.616    | 70 | 88.RHV      | training | 3.206    |
| 31 | 36.LWY      | training | 2.222    | 71 | 89.RHW      | training | 5.878    |
| 32 | 38.PHD      | training | 4.622    | 72 | 90.RHY      | training | 3.378    |
| 33 | 40.PHF      | training | 3.916    | 73 | 91.RWA      | training | 1.212    |
| 34 | 41.PHG      | training | 5.197    | 74 | 92.RWD      | training | 0.909    |
| 35 | 42.PHH      | training | 6.051    | 75 | 93.RWE      | training | 1.091    |
| 36 | 44.PHK      | training | 3.426    | 76 | 94.RWF      | training | 0.909    |
| 37 | 47.PHN      | training | 6.061    | 77 | 95.RWG      | training | 1.717    |
| 38 | 48.PHQ      | training | 3.718    | 78 | 96.RWH      | training | 1.091    |
| 39 | 49.PHR      | training | 4.751    | 79 | 97.RWI      | training | 1.232    |
| 40 | 50.PHS      | training | 4.042    | 80 | 98.RWK      | training | 0.606    |

| Ligand |         |          |          | Ligand |         |          |          |
|--------|---------|----------|----------|--------|---------|----------|----------|
| No     | Name    | QSAR Set | Activity | No     | Name    | QSAR Set | Activity |
| 81     | 99.RWL  | training | 3.212    | 121    | 166.AYY | training | 3.071    |
| 82     | 100.RWM | training | 0.727    | 122    | 167.IYY | training | 3.071    |
| 83     | 101.RWN | training | 2.404    | 123    | 168.LYY | training | 3.071    |
| 84     | 103.RWR | training | 2.384    | 124    | 169.FYY | training | 1.911    |
| 85     | 104.RWS | training | 0.808    | 125    | 170.WYY | training | 1.911    |
| 86     | 105.RWT | training | 3.818    | 126    | 172.GYY | training | 5.071    |
| 87     | 106.RWV | training | 0.606    | 127    | 173.NYY | training | 5.071    |
| 88     | 107.RWW | training | 2.707    | 128    | 174.QYY | training | 5.071    |
| 89     | 108.RWY | training | 0.808    | 129    | 176.SYY | training | 3.070    |
| 90     | 109.DHH | training | 0.905    | 130    | 178.CYY | training | 0.470    |
| 91     | 110.EHH | training | 0.905    | 131    | 179.YDY | training | 3.047    |
| 92     | 114.IHH | training | 2.020    | 132    | 180.YEY | training | 3.047    |
| 93     | 116.WHH | training | 1.803    | 133    | 181.YHY | training | 9.886    |
| 94     | 117.YHH | training | 1.803    | 134    | 182.YKY | training | 9.886    |
| 95     | 119.NHH | training | 1.089    | 135    | 183_YRY | training | 9.886    |
| 96     | 120.QHH | training | 1.089    | 136    | 185.YIY | training | 3.607    |
| 97     | 121.MHH | training | 2.015    | 137    | 186.YLY | training | 3.607    |
| 98     | 123.THH | training | 1.320    | 138    | 187.YFY | training | 2.233    |
| 99     | 124.CHH | training | 0.937    | 139    | 188.YWY | training | 2.233    |
| 100    | 125.HDH | training | 1.477    | 140    | 190.YGY | training | 3.366    |
| 101    | 126.HEH | training | 1.477    | 141    | 191.YNY | training | 3.366    |
| 102    | 131.HIH | training | 0.952    | 142    | 192.YQY | training | 3.366    |
| 103    | 132.HLH | training | 0.952    | 143    | 193.YMY | training | 1.780    |
| 104    | 133.HFH | training | 2.026    | 144    | 194.YSY | training | 3.447    |
| 105    | 135.HYH | training | 2.026    | 145    | 195.YTY | training | 3.447    |
| 106    | 136.HGH | training | 0.832    | 146    | 196.YCY | training | 3.087    |
| 107    | 137.HNH | training | 0.832    | 147    | 198.YYE | training | 4.116    |
| 108    | 140.HSH | training | 0.730    | 148    | 199.YYH | training | 5.303    |
| 109    | 141.HTH | training | 0.730    | 149    | 200.YYK | training | 5.303    |
| 110    | 142.HCH | training | 0.975    | 150    | 201.YYR | training | 5.303    |
| 111    | 144.HHE | training | 0.188    | 151    | 203.YYI | training | 3.344    |
| 112    | 151.HHF | training | 3.612    | 152    | 204.YYL | training | 3.344    |
| 113    | 152.HHW | training | 3.612    | 153    | 205.YYF | training | 4.050    |
| 114    | 153.HHY | training | 3.612    | 154    | 206.YYW | training | 4.050    |
| 115    | 154.HHG | training | 0.317    | 155    | 208.YYG | training | 2.996    |
| 116    | 156.HHQ | training | 0.317    | 156    | 210.YYQ | training | 2.996    |
| 117    | 160.HHC | training | 0.128    | 157    | 211.YYM | training | 2.103    |
| 118    | 161.DYY | training | 3.417    | 158    | 212.YYS | training | 3.983    |
| 119    | 163.HYY | training | 2.257    |        |         |          |          |
| 120    | 164.KYY | training | 2.257    |        |         |          |          |

| No  | Ligand Name | QSAR Set | Activity |
|-----|-------------|----------|----------|
| 159 | 14.LHS      | test     | 4.293    |
| 160 | 17.LHW      | test     | 6.791    |
| 161 | 19.LWA      | test     | 1.192    |
| 162 | 21.LWE      | test     | 1.717    |
| 163 | 35.LWW      | test     | 3.515    |
| 164 | 37.PHA      | test     | 5.793    |
| 165 | 39.PHE      | test     | 6.152    |
| 166 | 43.PHI      | test     | 4.916    |
| 167 | 45.PHL      | test     | 5.311    |
| 168 | 46.PHM      | test     | 3.714    |
| 169 | 57.PWE      | test     | 1.096    |
| 170 | 59.PWG      | test     | 2.687    |
| 171 | 61.PWI      | test     | 1.396    |
| 172 | 71.PWW      | test     | 2.899    |
| 173 | 75.RHE      | test     | 5.096    |
| 174 | 78.RHH      | test     | 3.296    |
| 175 | 79.RHI      | test     | 4.806    |
| 176 | 84.RHQ      | test     | 3.108    |
| 177 | 102.RWQ     | test     | 0.606    |
| 178 | 113.AHH     | test     | 2.020    |
| 179 | 115.FHH     | test     | 1.803    |
| 180 | 118.GHH     | test     | 1.089    |
| 181 | 122.SHH     | test     | 1.320    |
| 182 | 130.HAH     | test     | 0.952    |
| 183 | 134.HWH     | test     | 2.026    |
| 184 | 138.HQH     | test     | 0.832    |
| 185 | 139.HMH     | test     | 0.873    |
| 186 | 143.HHD     | test     | 0.188    |
| 187 | 155.HHN     | test     | 0.317    |
| 188 | 162.EYY     | test     | 3.417    |
| 189 | 165.RYY     | test     | 2.257    |
| 190 | 175.MYY     | test     | 1.991    |
| 191 | 177.TYY     | test     | 3.070    |
| 192 | 184.YAY     | test     | 3.607    |
| 193 | 197.YYD     | test     | 4.116    |
| 194 | 202.YYA     | test     | 3.344    |
| 195 | 209.YYN     | test     | 2.996    |
| 196 | 213.YYT     | test     | 3.983    |
| 197 | 214.YYC     | test     | 0.637    |

**Table S1.3.** Train and Test sets\_ Seed 3

| No. | Ligand Name | QSAR Set | Activity | No. | Ligand Name | QSAR Set | Activity |
|-----|-------------|----------|----------|-----|-------------|----------|----------|
| 1   | 2.LHD       | training | 3.593    | 41  | 51.PHT      | training | 6.247    |
| 2   | 3.LHE       | training | 6.136    | 42  | 54.PHY      | training | 4.227    |
| 3   | 4.LHF       | training | 3.628    | 43  | 56.PWD      | training | 1.096    |
| 4   | 5.LHG       | training | 6.697    | 44  | 57.PWE      | training | 1.096    |
| 5   | 7.LHI       | training | 6.531    | 45  | 58.PWF      | training | 0.919    |
| 6   | 9.LHL       | training | 5.92     | 46  | 59.PWG      | training | 2.687    |
| 7   | 10.LHM      | training | 4.504    | 47  | 60.PWH      | training | 1.184    |
| 8   | 11.LHN      | training | 5.148    | 48  | 61.PWI      | training | 1.396    |
| 9   | 12.LHQ      | training | 4.136    | 49  | 62.PWK      | training | 0.407    |
| 10  | 13.LHR      | training | 5.184    | 50  | 63.PWL      | training | 1.096    |
| 11  | 14.LHS      | training | 4.293    | 51  | 65.PWN      | training | 2.104    |
| 12  | 17.LHW      | training | 6.791    | 52  | 66.PWQ      | training | 1.202    |
| 13  | 18.LHY      | training | 4.203    | 53  | 67.PWR      | training | 2.705    |
| 14  | 21.LWE      | training | 1.717    | 54  | 69.PWT      | training | 2.598    |
| 15  | 22.LWF      | training | 1.414    | 55  | 70.PWV      | training | 1.008    |
| 16  | 24.LWH      | training | 3.212    | 56  | 71.PWW      | training | 2.899    |
| 17  | 25.LWI      | training | 1.111    | 57  | 72.PWY      | training | 1.114    |
| 18  | 26.LWK      | training | 1.899    | 58  | 74.RHD      | training | 3.304    |
| 19  | 27.LWL      | training | 0.606    | 59  | 75.RHE      | training | 5.096    |
| 20  | 28.LWM      | training | 1.394    | 60  | 76.RHF      | training | 3.3      |
| 21  | 29.LWN      | training | 1.313    | 61  | 77.RHG      | training | 5.725    |
| 22  | 30.LWQ      | training | 2.505    | 62  | 78.RHH      | training | 3.296    |
| 23  | 31.LWR      | training | 2.909    | 63  | 79.RHI      | training | 4.806    |
| 24  | 32.LWS      | training | 2.02     | 64  | 81.RHL      | training | 3.501    |
| 25  | 33.LWT      | training | 2.02     | 65  | 82.RHM      | training | 3.218    |
| 26  | 34.LWV      | training | 1.616    | 66  | 83.RHN      | training | 5.713    |
| 27  | 35.LWW      | training | 3.515    | 67  | 84.RHQ      | training | 3.108    |
| 28  | 36.LWY      | training | 2.222    | 68  | 85.RHR      | training | 4.302    |
| 29  | 37.PHA      | training | 5.793    | 69  | 86.RHS      | training | 3.386    |
| 30  | 38.PHD      | training | 4.622    | 70  | 87.RHT      | training | 5.987    |
| 31  | 40.PHF      | training | 3.916    | 71  | 88.RHV      | training | 3.206    |
| 32  | 41.PHG      | training | 5.197    | 72  | 90.RHY      | training | 3.378    |
| 33  | 42.PHH      | training | 6.051    | 73  | 91.RWA      | training | 1.212    |
| 34  | 44.PHK      | training | 3.426    | 74  | 92.RWD      | training | 0.909    |
| 35  | 45.PHL      | training | 5.311    | 75  | 94.RWF      | training | 0.909    |
| 36  | 46.PHM      | training | 3.714    | 76  | 95.RWG      | training | 1.717    |
| 37  | 47.PHN      | training | 6.061    | 77  | 96.RWH      | training | 1.091    |
| 38  | 48.PHQ      | training | 3.718    | 78  | 97.RWI      | training | 1.232    |
| 39  | 49.PHR      | training | 4.751    | 79  | 98.RWK      | training | 0.606    |
| 40  | 50.PHS      | training | 4.042    | 80  | 100.RWM     | training | 0.727    |

|     |         |          |       |     |         |          |       |
|-----|---------|----------|-------|-----|---------|----------|-------|
| 81  | 101.RWN | training | 2.404 | 121 | 166.AYY | training | 3.071 |
| 82  | 103.RWR | training | 2.384 | 122 | 168.LYY | training | 3.071 |
| 83  | 104.RWS | training | 0.808 | 123 | 169.FYY | training | 1.911 |
| 84  | 106.RWV | training | 0.606 | 124 | 170.WYY | training | 1.911 |
| 85  | 108.RWY | training | 0.808 | 125 | 172.GYY | training | 5.071 |
| 86  | 109.DHH | training | 0.905 | 126 | 173.NYY | training | 5.071 |
| 87  | 113.AHH | training | 2.02  | 127 | 174.QYY | training | 5.071 |
| 88  | 114.IHH | training | 2.02  | 128 | 176.SYY | training | 3.07  |
| 89  | 115.FHH | training | 1.803 | 129 | 177.TYY | training | 3.07  |
| 90  | 117.YHH | training | 1.803 | 130 | 179.YDY | training | 3.047 |
| 91  | 118.GHH | training | 1.089 | 131 | 181.YHY | training | 9.886 |
| 92  | 119.NHH | training | 1.089 | 132 | 182.YKY | training | 9.886 |
| 93  | 120.QHH | training | 1.089 | 133 | 183_YRY | training | 9.886 |
| 94  | 121.MHH | training | 2.015 | 134 | 184.YAY | training | 3.607 |
| 95  | 122.SHH | training | 1.32  | 135 | 185.YIY | training | 3.607 |
| 96  | 123.THH | training | 1.32  | 136 | 187.YFY | training | 2.233 |
| 97  | 124.CHH | training | 0.937 | 137 | 188.YWY | training | 2.233 |
| 98  | 125.HDH | training | 1.477 | 138 | 190.YGY | training | 3.366 |
| 99  | 126.HEH | training | 1.477 | 139 | 192.YQY | training | 3.366 |
| 100 | 130.HAH | training | 0.952 | 140 | 193.YMY | training | 1.78  |
| 101 | 131.HIH | training | 0.952 | 141 | 194.YSY | training | 3.447 |
| 102 | 132.HLH | training | 0.952 | 142 | 195.YTY | training | 3.447 |
| 103 | 134.HWH | training | 2.026 | 143 | 196.YCY | training | 3.087 |
| 104 | 135.HYH | training | 2.026 | 144 | 197.YYD | training | 4.116 |
| 105 | 137.HNH | training | 0.832 | 145 | 198.YYE | training | 4.116 |
| 106 | 138.HQH | training | 0.832 | 146 | 199.YYH | training | 5.303 |
| 107 | 139.HMH | training | 0.873 | 147 | 200.YYK | training | 5.303 |
| 108 | 140.HSH | training | 0.73  | 148 | 201.YYR | training | 5.303 |
| 109 | 141.HTH | training | 0.73  | 149 | 202.YYA | training | 3.344 |
| 110 | 144.HHE | training | 0.188 | 150 | 203.YYI | training | 3.344 |
| 111 | 151.HHF | training | 3.612 | 151 | 204.YYL | training | 3.344 |
| 112 | 152.HHW | training | 3.612 | 152 | 205.YYF | training | 4.05  |
| 113 | 153.HHY | training | 3.612 | 153 | 208.YYG | training | 2.996 |
| 114 | 154.HHG | training | 0.317 | 154 | 209.YYN | training | 2.996 |
| 115 | 155.HHN | training | 0.317 | 155 | 210.YYQ | training | 2.996 |
| 116 | 156.HHQ | training | 0.317 | 156 | 212.YYS | training | 3.983 |
| 117 | 160.HHC | training | 0.128 | 157 | 213.YYT | training | 3.983 |
| 118 | 162.EYY | training | 3.417 | 158 | 214.YYC | training | 0.637 |
| 119 | 163.HYY | training | 2.257 |     |         |          |       |
| 120 | 165.RYY | training | 2.257 |     |         |          |       |



|     |         |      |       |
|-----|---------|------|-------|
| 159 | 1.LHA   | test | 3.918 |
| 160 | 6.LHH   | test | 4.836 |
| 161 | 8.LHK   | test | 4.225 |
| 162 | 15.LHT  | test | 5.584 |
| 163 | 16.LHV  | test | 3.481 |
| 164 | 19.LWA  | test | 1.192 |
| 165 | 20.LWD  | test | 1.717 |
| 166 | 23.LWG  | test | 1.313 |
| 167 | 39.PHE  | test | 6.152 |
| 168 | 43.PHI  | test | 4.916 |
| 169 | 52.PHV  | test | 3.335 |
| 170 | 53.PHW  | test | 6.535 |
| 171 | 55.PWA  | test | 1.396 |
| 172 | 64.PWM  | test | 0.796 |
| 173 | 68.PWS  | test | 1.096 |
| 174 | 73.RHA  | test | 5.205 |
| 175 | 80.RHK  | test | 2.694 |
| 176 | 89.RHW  | test | 5.878 |
| 177 | 93.RWE  | test | 1.091 |
| 178 | 99.RWL  | test | 3.212 |
| 179 | 102.RWQ | test | 0.606 |
| 180 | 105.RWT | test | 3.818 |
| 181 | 107.RWW | test | 2.707 |
| 182 | 110.EHH | test | 0.905 |
| 183 | 116.WHH | test | 1.803 |
| 184 | 133.HFH | test | 2.026 |
| 185 | 136.HGH | test | 0.832 |
| 186 | 142.HCH | test | 0.975 |
| 187 | 143.HHD | test | 0.188 |
| 188 | 161.DYY | test | 3.417 |
| 189 | 164.KYY | test | 2.257 |
| 190 | 167.IYY | test | 3.071 |
| 191 | 175.MYY | test | 1.991 |
| 192 | 178.CYY | test | 0.47  |
| 193 | 180.YEY | test | 3.047 |
| 194 | 186.YLY | test | 3.607 |
| 195 | 191.YNY | test | 3.366 |
| 196 | 206.YYW | test | 4.05  |
| 197 | 211.YYM | test | 2.103 |

**Table S1.4.** Train and Test sets\_ Seed 4

| No. | Ligand Name | QSAR Set | Activity | No. | Ligand Name | QSAR Set | Activity |
|-----|-------------|----------|----------|-----|-------------|----------|----------|
| 1   | 1.LHA       | training | 3.918    | 41  | 53.PHW      | training | 6.535    |
| 2   | 2.LHD       | training | 3.593    | 42  | 54.PHY      | training | 4.227    |
| 3   | 3.LHE       | training | 6.136    | 43  | 55.PWA      | training | 1.396    |
| 4   | 4.LHF       | training | 3.628    | 44  | 56.PWD      | training | 1.096    |
| 5   | 5.LHG       | training | 6.697    | 45  | 58.PWF      | training | 0.919    |
| 6   | 7.LHI       | training | 6.531    | 46  | 59.PWG      | training | 2.687    |
| 7   | 8.LHK       | training | 4.225    | 47  | 60.PWH      | training | 1.184    |
| 8   | 9.LHL       | training | 5.92     | 48  | 61.PWI      | training | 1.396    |
| 9   | 10.LHM      | training | 4.504    | 49  | 62.PWK      | training | 0.407    |
| 10  | 11.LHN      | training | 5.148    | 50  | 63.PWL      | training | 1.096    |
| 11  | 14.LHS      | training | 4.293    | 51  | 64.PWM      | training | 0.796    |
| 12  | 16.LHV      | training | 3.481    | 52  | 65.PWN      | training | 2.104    |
| 13  | 18.LHY      | training | 4.203    | 53  | 66.PWQ      | training | 1.202    |
| 14  | 19.LWA      | training | 1.192    | 54  | 67.PWR      | training | 2.705    |
| 15  | 21.LWE      | training | 1.717    | 55  | 68.PWS      | training | 1.096    |
| 16  | 24.LWH      | training | 3.212    | 56  | 70.PWV      | training | 1.008    |
| 17  | 25.LWI      | training | 1.111    | 57  | 71.PWW      | training | 2.899    |
| 18  | 26.LWK      | training | 1.899    | 58  | 72.PWY      | training | 1.114    |
| 19  | 28.LWM      | training | 1.394    | 59  | 73.RHA      | training | 5.205    |
| 20  | 29.LWN      | training | 1.313    | 60  | 74.RHD      | training | 3.304    |
| 21  | 30.LWQ      | training | 2.505    | 61  | 75.RHE      | training | 5.096    |
| 22  | 31.LWR      | training | 2.909    | 62  | 76.RHF      | training | 3.3      |
| 23  | 32.LWS      | training | 2.02     | 63  | 77.RHG      | training | 5.725    |
| 24  | 34.LWV      | training | 1.616    | 64  | 79.RHI      | training | 4.806    |
| 25  | 35.LWW      | training | 3.515    | 65  | 80.RHK      | training | 2.694    |
| 26  | 36.LWY      | training | 2.222    | 66  | 82.RHM      | training | 3.218    |
| 27  | 37.PHA      | training | 5.793    | 67  | 83.RHN      | training | 5.713    |
| 28  | 38.PHD      | training | 4.622    | 68  | 84.RHQ      | training | 3.108    |
| 29  | 39.PHE      | training | 6.152    | 69  | 86.RHS      | training | 3.386    |
| 30  | 40.PHF      | training | 3.916    | 70  | 87.RHT      | training | 5.987    |
| 31  | 41.PHG      | training | 5.197    | 71  | 88.RHV      | training | 3.206    |
| 32  | 43.PHI      | training | 4.916    | 72  | 89.RHW      | training | 5.878    |
| 33  | 44.PHK      | training | 3.426    | 73  | 91.RWA      | training | 1.212    |
| 34  | 45.PHL      | training | 5.311    | 74  | 93.RWE      | training | 1.091    |
| 35  | 46.PHM      | training | 3.714    | 75  | 94.RWF      | training | 0.909    |
| 36  | 47.PHN      | training | 6.061    | 76  | 95.RWG      | training | 1.717    |
| 37  | 48.PHQ      | training | 3.718    | 77  | 96.RWH      | training | 1.091    |
| 38  | 49.PHR      | training | 4.751    | 78  | 97.RWI      | training | 1.232    |
| 39  | 50.PHS      | training | 4.042    | 79  | 98.RWK      | training | 0.606    |
| 40  | 52.PHV      | training | 3.335    | 80  | 99.RWL      | training | 3.212    |

|     |         |          |       |     |         |          |       |
|-----|---------|----------|-------|-----|---------|----------|-------|
| 81  | 100.RWM | training | 0.727 | 121 | 166.AYY | training | 3.071 |
| 82  | 102.RWQ | training | 0.606 | 122 | 167.IYY | training | 3.071 |
| 83  | 103.RWR | training | 2.384 | 123 | 168.LYY | training | 3.071 |
| 84  | 104.RWS | training | 0.808 | 124 | 169.FYY | training | 1.911 |
| 85  | 107.RWW | training | 2.707 | 125 | 170.WYY | training | 1.911 |
| 86  | 109.DHH | training | 0.905 | 126 | 172.GYY | training | 5.071 |
| 87  | 110.EHH | training | 0.905 | 127 | 173.NYY | training | 5.071 |
| 88  | 113.AHH | training | 2.02  | 128 | 174.QYY | training | 5.071 |
| 89  | 114.IHH | training | 2.02  | 129 | 175.MYY | training | 1.991 |
| 90  | 115.FHH | training | 1.803 | 130 | 176.SYY | training | 3.07  |
| 91  | 116.WHH | training | 1.803 | 131 | 177.TYY | training | 3.07  |
| 92  | 118.GHH | training | 1.089 | 132 | 178.CYY | training | 0.47  |
| 93  | 120.QHH | training | 1.089 | 133 | 179.YDY | training | 3.047 |
| 94  | 121.MHH | training | 2.015 | 134 | 181.YHY | training | 9.886 |
| 95  | 123.THH | training | 1.32  | 135 | 182.YKY | training | 9.886 |
| 96  | 124.CHH | training | 0.937 | 136 | 183_YRY | training | 9.886 |
| 97  | 125.HDH | training | 1.477 | 137 | 184.YAY | training | 3.607 |
| 98  | 126.HEH | training | 1.477 | 138 | 185.YIY | training | 3.607 |
| 99  | 130.HAH | training | 0.952 | 139 | 186.YLY | training | 3.607 |
| 100 | 131.HIH | training | 0.952 | 140 | 187.YFY | training | 2.233 |
| 101 | 132.HLH | training | 0.952 | 141 | 190.YGY | training | 3.366 |
| 102 | 134.HWH | training | 2.026 | 142 | 191.YNY | training | 3.366 |
| 103 | 135.HYH | training | 2.026 | 143 | 192.YQY | training | 3.366 |
| 104 | 136.HGH | training | 0.832 | 144 | 193.YMY | training | 1.78  |
| 105 | 137.HNH | training | 0.832 | 145 | 194.YSY | training | 3.447 |
| 106 | 139.HMH | training | 0.873 | 146 | 197.YYD | training | 4.116 |
| 107 | 140.HSH | training | 0.73  | 147 | 198.YYE | training | 4.116 |
| 108 | 141.HTH | training | 0.73  | 148 | 199.YYH | training | 5.303 |
| 109 | 143.HHD | training | 0.188 | 149 | 201.YYR | training | 5.303 |
| 110 | 151.HHF | training | 3.612 | 150 | 202.YYA | training | 3.344 |
| 111 | 153.HHY | training | 3.612 | 151 | 204.YYL | training | 3.344 |
| 112 | 154.HHG | training | 0.317 | 152 | 205.YYF | training | 4.05  |
| 113 | 155.HHN | training | 0.317 | 153 | 208.YYG | training | 2.996 |
| 114 | 156.HHQ | training | 0.317 | 154 | 210.YYQ | training | 2.996 |
| 115 | 160.HHC | training | 0.128 | 155 | 211.YYM | training | 2.103 |
| 116 | 161.DYY | training | 3.417 | 156 | 212.YYS | training | 3.983 |
| 117 | 162.EYY | training | 3.417 | 157 | 213.YYT | training | 3.983 |
| 118 | 163.HYY | training | 2.257 | 158 | 214.YYC | training | 0.637 |
| 119 | 164.KYY | training | 2.257 |     |         |          |       |
| 120 | 165.RYY | training | 2.257 |     |         |          |       |

|     |         |      |       |
|-----|---------|------|-------|
| 159 | 6.LHH   | test | 4.836 |
| 160 | 12.LHQ  | test | 4.136 |
| 161 | 13.LHR  | test | 5.184 |
| 162 | 15.LHT  | test | 5.584 |
| 163 | 17.LHW  | test | 6.791 |
| 164 | 20.LWD  | test | 1.717 |
| 165 | 22.LWF  | test | 1.414 |
| 166 | 23.LWG  | test | 1.313 |
| 167 | 27.LWL  | test | 0.606 |
| 168 | 33.LWT  | test | 2.02  |
| 169 | 42.PHH  | test | 6.051 |
| 170 | 51.PHT  | test | 6.247 |
| 171 | 57.PWE  | test | 1.096 |
| 172 | 69.PWT  | test | 2.598 |
| 173 | 78.RHH  | test | 3.296 |
| 174 | 81.RHL  | test | 3.501 |
| 175 | 85.RHR  | test | 4.302 |
| 176 | 90.RHY  | test | 3.378 |
| 177 | 92.RWD  | test | 0.909 |
| 178 | 101.RWN | test | 2.404 |
| 179 | 105.RWT | test | 3.818 |
| 180 | 106.RWV | test | 0.606 |
| 181 | 108.RWY | test | 0.808 |
| 182 | 117.YHH | test | 1.803 |
| 183 | 119.NHH | test | 1.089 |
| 184 | 122.SHH | test | 1.32  |
| 185 | 133.HFH | test | 2.026 |
| 186 | 138.HQH | test | 0.832 |
| 187 | 142.HCH | test | 0.975 |
| 188 | 144.HHE | test | 0.188 |
| 189 | 152.HHW | test | 3.612 |
| 190 | 180.YEY | test | 3.047 |
| 191 | 188.YWY | test | 2.233 |
| 192 | 195.YTY | test | 3.447 |
| 193 | 196.YCY | test | 3.087 |
| 194 | 200.YYK | test | 5.303 |
| 195 | 203.YYI | test | 3.344 |
| 196 | 206.YYW | test | 4.05  |
| 197 | 209.YYN | test | 2.996 |

**Table S1.5.** Train and Test sets\_ Seed 5

| No. | Ligand Name | QSAR Set | Activity | No. | Ligand Name | QSAR Set | Activity |
|-----|-------------|----------|----------|-----|-------------|----------|----------|
| 1   | 1.LHA       | training | 3.918    | 41  | 51.PHT      | training | 6.247    |
| 2   | 2.LHD       | training | 3.593    | 42  | 52.PHV      | training | 3.335    |
| 3   | 3.LHE       | training | 6.136    | 43  | 53.PHW      | training | 6.535    |
| 4   | 4.LHF       | training | 3.628    | 44  | 54.PHY      | training | 4.227    |
| 5   | 7.LHI       | training | 6.531    | 45  | 55.PWA      | training | 1.396    |
| 6   | 8.LHK       | training | 4.225    | 46  | 56.PWD      | training | 1.096    |
| 7   | 9.LHL       | training | 5.92     | 47  | 57.PWE      | training | 1.096    |
| 8   | 10.LHM      | training | 4.504    | 48  | 58.PWF      | training | 0.919    |
| 9   | 12.LHQ      | training | 4.136    | 49  | 59.PWG      | training | 2.687    |
| 10  | 13.LHR      | training | 5.184    | 50  | 60.PWH      | training | 1.184    |
| 11  | 14.LHS      | training | 4.293    | 51  | 61.PWI      | training | 1.396    |
| 12  | 16.LHV      | training | 3.481    | 52  | 63.PWL      | training | 1.096    |
| 13  | 19.LWA      | training | 1.192    | 53  | 64.PWM      | training | 0.796    |
| 14  | 21.LWE      | training | 1.717    | 54  | 65.PWN      | training | 2.104    |
| 15  | 22.LWF      | training | 1.414    | 55  | 66.PWQ      | training | 1.202    |
| 16  | 23.LWG      | training | 1.313    | 56  | 67.PWR      | training | 2.705    |
| 17  | 24.LWH      | training | 3.212    | 57  | 69.PWT      | training | 2.598    |
| 18  | 25.LWI      | training | 1.111    | 58  | 70.PWV      | training | 1.008    |
| 19  | 26.LWK      | training | 1.899    | 59  | 72.PWY      | training | 1.114    |
| 20  | 27.LWL      | training | 0.606    | 60  | 74.RHD      | training | 3.304    |
| 21  | 28.LWM      | training | 1.394    | 61  | 75.RHE      | training | 5.096    |
| 22  | 31.LWR      | training | 2.909    | 62  | 76.RHF      | training | 3.3      |
| 23  | 32.LWS      | training | 2.02     | 63  | 77.RHG      | training | 5.725    |
| 24  | 33.LWT      | training | 2.02     | 64  | 78.RHH      | training | 3.296    |
| 25  | 34.LWV      | training | 1.616    | 65  | 79.RHI      | training | 4.806    |
| 26  | 35.LWW      | training | 3.515    | 66  | 80.RHK      | training | 2.694    |
| 27  | 36.LWY      | training | 2.222    | 67  | 81.RHL      | training | 3.501    |
| 28  | 37.PHA      | training | 5.793    | 68  | 83.RHN      | training | 5.713    |
| 29  | 39.PHE      | training | 6.152    | 69  | 85.RHR      | training | 4.302    |
| 30  | 40.PHF      | training | 3.916    | 70  | 86.RHS      | training | 3.386    |
| 31  | 41.PHG      | training | 5.197    | 71  | 88.RHV      | training | 3.206    |
| 32  | 42.PHH      | training | 6.051    | 72  | 89.RHW      | training | 5.878    |
| 33  | 43.PHI      | training | 4.916    | 73  | 91.RWA      | training | 1.212    |
| 34  | 44.PHK      | training | 3.426    | 74  | 92.RWD      | training | 0.909    |
| 35  | 45.PHL      | training | 5.311    | 75  | 93.RWE      | training | 1.091    |
| 36  | 46.PHM      | training | 3.714    | 76  | 94.RWF      | training | 0.909    |
| 37  | 47.PHN      | training | 6.061    | 77  | 95.RWG      | training | 1.717    |
| 38  | 48.PHQ      | training | 3.718    | 78  | 97.RWI      | training | 1.232    |
| 39  | 49.PHR      | training | 4.751    | 79  | 98.RWK      | training | 0.606    |
| 40  | 50.PHS      | training | 4.042    | 80  | 99.RWL      | training | 3.212    |

| No. | Ligand Name | QSAR Set | Activity | No. | Ligand Name | QSAR Set | Activity |
|-----|-------------|----------|----------|-----|-------------|----------|----------|
| 81  | 100.RWM     | training | 0.727    | 121 | 163.HYY     | training | 2.257    |
| 82  | 101.RWN     | training | 2.404    | 122 | 165.RYY     | training | 2.257    |
| 83  | 102.RWQ     | training | 0.606    | 123 | 166.AYY     | training | 3.071    |
| 84  | 103.RWR     | training | 2.384    | 124 | 167.IYY     | training | 3.071    |
| 85  | 104.RWS     | training | 0.808    | 125 | 168.LYY     | training | 3.071    |
| 86  | 105.RWT     | training | 3.818    | 126 | 169.FYY     | training | 1.911    |
| 87  | 106.RWV     | training | 0.606    | 127 | 170.WYY     | training | 1.911    |
| 88  | 107.RWW     | training | 2.707    | 128 | 172.GYY     | training | 5.071    |
| 89  | 108.RWY     | training | 0.808    | 129 | 173.NYY     | training | 5.071    |
| 90  | 110.EHH     | training | 0.905    | 130 | 174.QYY     | training | 5.071    |
| 91  | 114.IHH     | training | 2.02     | 131 | 176.SYY     | training | 3.07     |
| 92  | 115.FHH     | training | 1.803    | 132 | 178.CYY     | training | 0.47     |
| 93  | 116.WHH     | training | 1.803    | 133 | 180.YEY     | training | 3.047    |
| 94  | 117.YHH     | training | 1.803    | 134 | 181.YHY     | training | 9.886    |
| 95  | 119.NHH     | training | 1.089    | 135 | 182.YKY     | training | 9.886    |
| 96  | 120.QHH     | training | 1.089    | 136 | 183_YRY     | training | 9.886    |
| 97  | 121.MHH     | training | 2.015    | 137 | 184.YAY     | training | 3.607    |
| 98  | 122.SHH     | training | 1.32     | 138 | 186.YLY     | training | 3.607    |
| 99  | 124.CHH     | training | 0.937    | 139 | 187.YFY     | training | 2.233    |
| 100 | 125.HDH     | training | 1.477    | 140 | 188.YWY     | training | 2.233    |
| 101 | 126.HEH     | training | 1.477    | 141 | 190.YGY     | training | 3.366    |
| 102 | 131.HIH     | training | 0.952    | 142 | 192.YQY     | training | 3.366    |
| 103 | 132.HLH     | training | 0.952    | 143 | 195.YTY     | training | 3.447    |
| 104 | 134.HWH     | training | 2.026    | 144 | 196.YCY     | training | 3.087    |
| 105 | 135.HYH     | training | 2.026    | 145 | 198.YYE     | training | 4.116    |
| 106 | 136.HGH     | training | 0.832    | 146 | 199.YYH     | training | 5.303    |
| 107 | 137.HNH     | training | 0.832    | 147 | 200.YYK     | training | 5.303    |
| 108 | 139.HMH     | training | 0.873    | 148 | 201.YYR     | training | 5.303    |
| 109 | 140.HSH     | training | 0.73     | 149 | 202.YYA     | training | 3.344    |
| 110 | 141.HTH     | training | 0.73     | 150 | 203.YYI     | training | 3.344    |
| 111 | 142.HCH     | training | 0.975    | 151 | 204.YYL     | training | 3.344    |
| 112 | 143.HHD     | training | 0.188    | 152 | 205.YYF     | training | 4.05     |
| 113 | 144.HHE     | training | 0.188    | 153 | 206.YYW     | training | 4.05     |
| 114 | 152.HHW     | training | 3.612    | 154 | 208.YYG     | training | 2.996    |
| 115 | 153.HHY     | training | 3.612    | 155 | 209.YYN     | training | 2.996    |
| 116 | 154.HHG     | training | 0.317    | 156 | 210.YYQ     | training | 2.996    |
| 117 | 156.HHQ     | training | 0.317    | 157 | 211.YYM     | training | 2.103    |
| 118 | 160.HHC     | training | 0.128    | 158 | 213.YYT     | training | 3.983    |
| 119 | 161.DYY     | training | 3.417    |     |             |          |          |
| 120 | 162.EYY     | training | 3.417    |     |             |          |          |

| No. | Ligand Name | QSAR Set | Activity |
|-----|-------------|----------|----------|
| 159 | 5.LHG       | test     | 6.697    |
| 160 | 6.LHH       | test     | 4.836    |
| 161 | 11.LHN      | test     | 5.148    |
| 162 | 15.LHT      | test     | 5.584    |
| 163 | 17.LHW      | test     | 6.791    |
| 164 | 18.LHY      | test     | 4.203    |
| 165 | 20.LWD      | test     | 1.717    |
| 166 | 29.LWN      | test     | 1.313    |
| 167 | 30.LWQ      | test     | 2.505    |
| 168 | 38.PHD      | test     | 4.622    |
| 169 | 62.PWK      | test     | 0.407    |
| 170 | 68.PWS      | test     | 1.096    |
| 171 | 71.PWW      | test     | 2.899    |
| 172 | 73.RHA      | test     | 5.205    |
| 173 | 82.RHM      | test     | 3.218    |
| 174 | 84.RHQ      | test     | 3.108    |
| 175 | 87.RHT      | test     | 5.987    |
| 176 | 90.RHY      | test     | 3.378    |
| 177 | 96.RWH      | test     | 1.091    |
| 178 | 109.DHH     | test     | 0.905    |
| 179 | 113.AHH     | test     | 2.02     |
| 180 | 118.GHH     | test     | 1.089    |
| 181 | 123.THH     | test     | 1.32     |
| 182 | 130.HAH     | test     | 0.952    |
| 183 | 133.HFH     | test     | 2.026    |
| 184 | 138.HQH     | test     | 0.832    |
| 185 | 151.HHF     | test     | 3.612    |
| 186 | 155.HHN     | test     | 0.317    |
| 187 | 164.KYY     | test     | 2.257    |
| 188 | 175.MYY     | test     | 1.991    |
| 189 | 177.TYY     | test     | 3.07     |
| 190 | 179.YDY     | test     | 3.047    |
| 191 | 185.YIY     | test     | 3.607    |
| 192 | 191.YNY     | test     | 3.366    |
| 193 | 193.YMY     | test     | 1.78     |
| 194 | 194.YSY     | test     | 3.447    |
| 195 | 197.YYD     | test     | 4.116    |
| 196 | 212.YYS     | test     | 3.983    |
| 197 | 214.YYC     | test     | 0.637    |

**Figure S1.1.** Distribution of Prediction Errors for PLS number of 3

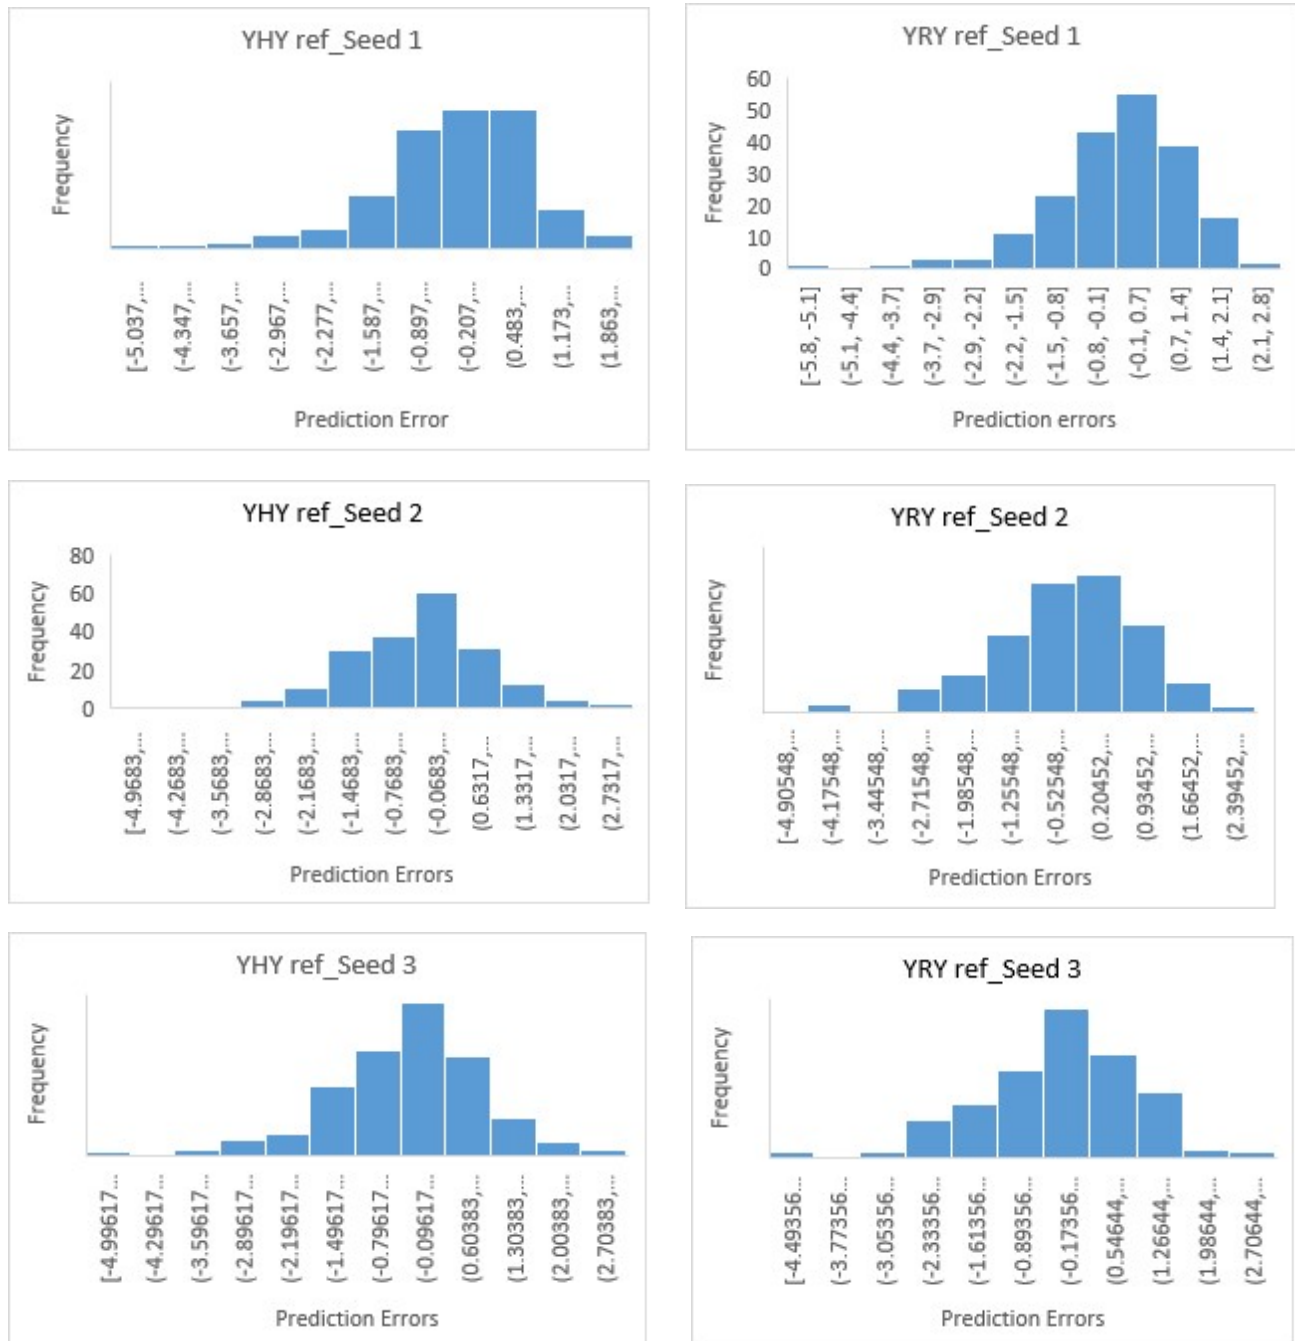



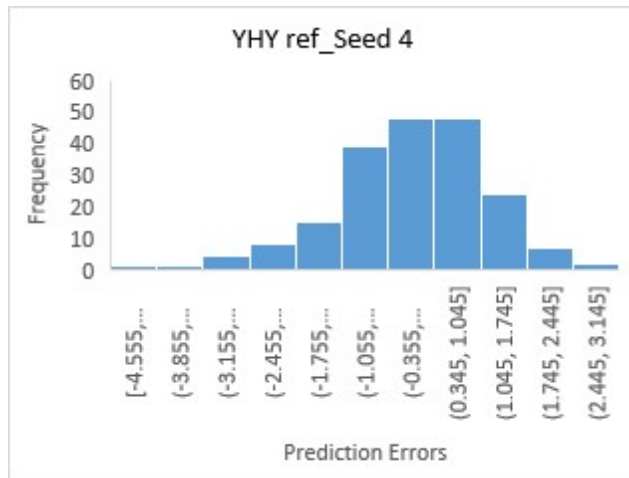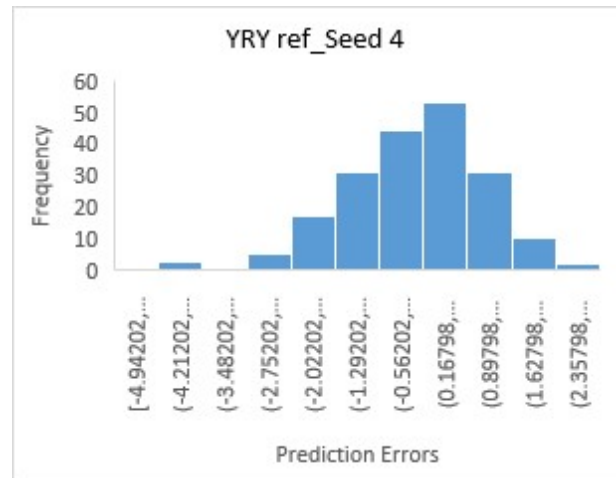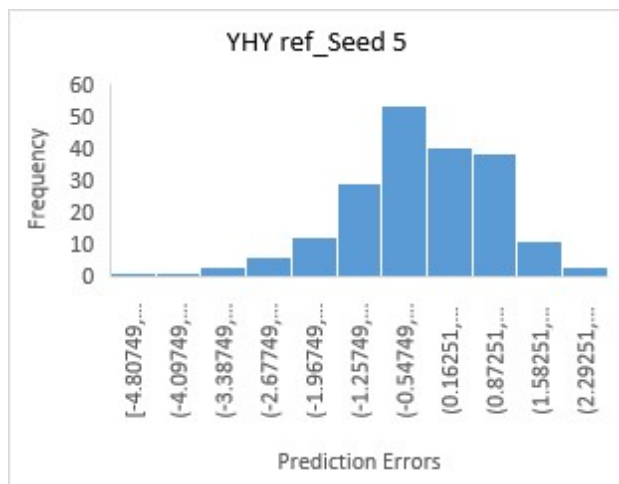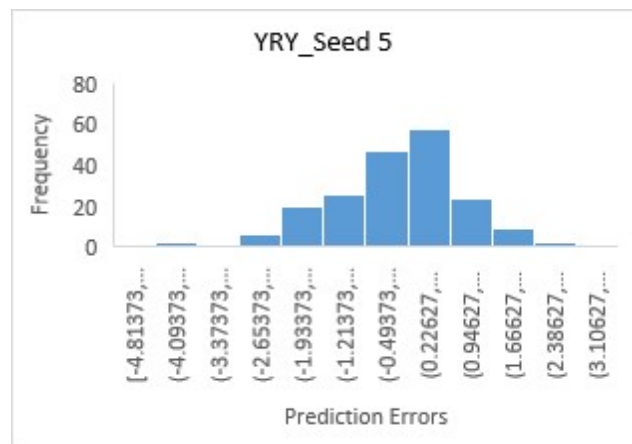

## Supplementary 2. Statistical parameters used in OPLS, Tripos and ML based CoMSIA models

1. Coefficient of multiple determination for the training set ( $R^2$ )

$$R^2 = \frac{MSS}{TSS} = 1 - \frac{RSS}{TSS}$$

$$MSS = \sum_{i=1}^n (\hat{y}_i - \bar{y})^2$$

$$TSS = \sum_{i=1}^n (y_i - \bar{y})^2$$

$$RSS = \sum_{i=1}^n (y_i - \hat{y}_i)^2$$

$y_i$ : observed response for the  $i^{\text{th}}$  compound

$\bar{y}$ : the mean of responses in the training set

$\hat{y}_i$ : response of  $i^{\text{th}}$  compound calculated using the regression model

$n$ : total number of compounds in the training set

2. Root mean square error in fitting/ root mean square error for training set (RMSE)

$$RMSE = \sqrt{\frac{RSS}{n}} = \sqrt{\frac{\sum_{i=1}^n (y_i - \hat{y}_i)^2}{n}}$$

3. The standard error of prediction (SEP)

$$SEP = \sqrt{\frac{RSS}{n-m}} = \sqrt{\frac{\sum_{i=1}^n (y_i - \hat{y}_i)^2}{n-m}}$$

$n$ : total number of compounds in the training set

$m$ : the number of PLS factors

4. F-value (F)

$$F = \frac{MSS}{RSS} \times \frac{n-m-1}{m}$$

$n$ : total number of compounds in the training set

$m$ : the number of PLS factors

The F-statistic represents the ratio of model variance distributed across  $m$  degrees of freedom to the activity variance distributed across  $n-m-1$  degrees of freedom. Higher F-values indicate a stronger statistical significance in the regression analysis.

5. Cross-validated  $R^2_{CV}$  value, computed from predictions obtained by a leave-M-out approach (if  $M = 1$ ,  $R^2_{CV} = R^2_{LOO}$ )

$$R^2_{CV} = 1 - \frac{PRESS_{CV}}{TSS} = \frac{\sum_{i=1}^n (y_i - \hat{y}_{i/i})^2}{TSS}$$

$PRESS_{CV}$  cross-validated residual sum of squares

$y_i$ : observed response for the  $i^{\text{th}}$  compound

$\hat{y}_i$ : response of the  $i^{\text{th}}$  object estimated by using a model obtained without using  $M$  compounds (the  $i^{\text{th}}$  object is one of the  $M$  compounds)

6. Variance explained in external prediction using the mean of the training set ( $Q^2$  also known as  $Q^2_{F1}$ )

$$Q^2 = 1 - \frac{PRESS_{test}}{TSS_{(y_{train})}}$$

$$TSS_{(y_{train})} = \sum_{i=1}^t (y_i - \bar{y}_{train})^2$$

$$PRESS_{test} = \sum_{i=1}^t (y_i - \hat{y}_i)^2$$

$\bar{y}_{train}$ : the mean of the training-set responses

$y_i$ : observed response for the  $i^{\text{th}}$  compound in the test set

$\hat{y}_i$ : predicted response for the  $i^{\text{th}}$  compound in the test set

$t$ : total number of compounds in the test set

7. Root mean square error in external prediction (RMSE\_test)

$$RMSE_{test} = \sqrt{\frac{\sum_{i=1}^t (y_i - \hat{y}_i)^2}{t}}$$

8. Variance explained in external prediction using the mean of the test set ( $R^2_{test}$  also known as  $Q^2_{F2}$ )

$$R^2_{test} = 1 - \frac{PRESS_{test}}{TSS_{(y_{test})}}$$

$$TSS_{(y_{test})} = \sum_{i=1}^t (y_i - \bar{y}_{test})^2$$

$$PRESS_{test} = \sum_{i=1}^t (y_i - \hat{y}_i)^2$$

$\bar{y}_{test}$ : the mean of the test-set responses

$y_i$ : observed response for the  $i^{\text{th}}$  compound in the test set

$\hat{y}_i$ : predicted response for the  $i^{\text{th}}$  compound in the test set

$t$ : total number of compounds in the test set

9.  $R^2_{scramble}$ : Average value of  $R^2$  from a series of models built using scrambled activities, measures the degree to which the molecular fields can fit random data. A low value means that the model cannot fit random data, but a high value merely means that the variable set is fairly complete and can fit anything.

### Supplementary 3

**Table S3.1.** Five CoMSIA interaction fields from FTC dataset with YRY reference

The Table S3.1 can be found at:

[https://docs.google.com/spreadsheets/d/1UYyIjOepMVyfRX5VJnK75\\_VJ3KzvX2Vo/edit?usp=sharing&ouid=106421106263255583273&rtpof=true&sd=true](https://docs.google.com/spreadsheets/d/1UYyIjOepMVyfRX5VJnK75_VJ3KzvX2Vo/edit?usp=sharing&ouid=106421106263255583273&rtpof=true&sd=true)

### Supplementary 4

**Table S4.1.** The statistics of OPLS models with **reference YHY** and random seed 1

| #       |       |                |                              | R <sup>2</sup> <sub>Scrambl</sub> |           |         | RMSE <sub>tes</sub> |                | Pearson |
|---------|-------|----------------|------------------------------|-----------------------------------|-----------|---------|---------------------|----------------|---------|
| Factors | SD    | R <sup>2</sup> | R <sup>2</sup> <sub>cv</sub> | e                                 | Stability | F       | t                   | Q <sup>2</sup> | -r      |
| 1       | 1.542 | 0.314          | 0.272                        | 0.056                             | 0.997     | 71.500  | 1.630               | 0.335          | 0.588   |
| 2       | 1.184 | 0.598          | 0.528                        | 0.086                             | 0.992     | 115.300 | 1.230               | 0.619          | 0.800   |
| 3       | 1.136 | 0.633          | 0.555                        | 0.123                             | 0.992     | 88.400  | 1.220               | 0.628          | 0.804   |
| 4       | 1.091 | 0.663          | 0.542                        | 0.166                             | 0.978     | 75.400  | 1.220               | 0.626          | 0.796   |
| 5       | 1.059 | 0.685          | 0.526                        | 0.188                             | 0.959     | 66.100  | 1.200               | 0.638          | 0.803   |
| 6       | 1.035 | 0.701          | 0.523                        | 0.214                             | 0.942     | 58.900  | 1.170               | 0.657          | 0.814   |
| 7       | 1.014 | 0.715          | 0.518                        | 0.235                             | 0.924     | 53.700  | 1.180               | 0.649          | 0.809   |
| 8       | 1.000 | 0.724          | 0.517                        | 0.252                             | 0.911     | 49.000  | 1.130               | 0.680          | 0.827   |
| 9       | 0.975 | 0.740          | 0.530                        | 0.271                             | 0.897     | 46.800  | 1.090               | 0.702          | 0.840   |
| 10      | 0.965 | 0.747          | 0.529                        | 0.287                             | 0.887     | 43.400  | 1.100               | 0.698          | 0.838   |
| 11      | 0.948 | 0.757          | 0.520                        | 0.303                             | 0.873     | 41.400  | 1.130               | 0.682          | 0.832   |
| 12      | 0.944 | 0.761          | 0.513                        | 0.316                             | 0.869     | 38.500  | 1.140               | 0.672          | 0.827   |
| 13      | 0.937 | 0.766          | 0.505                        | 0.323                             | 0.863     | 36.300  | 1.170               | 0.654          | 0.818   |
| 14      | 0.928 | 0.772          | 0.495                        | 0.333                             | 0.861     | 34.600  | 1.200               | 0.637          | 0.811   |
| 15      | 0.918 | 0.779          | 0.495                        | 0.344                             | 0.859     | 33.300  | 1.220               | 0.625          | 0.809   |
| 16      | 0.901 | 0.789          | 0.486                        | 0.353                             | 0.854     | 32.900  | 1.220               | 0.625          | 0.816   |
| 17      | 0.878 | 0.800          | 0.443                        | 0.365                             | 0.810     | 33.000  | 1.260               | 0.604          | 0.817   |
| 18      | 0.857 | 0.811          | 0.440                        | 0.373                             | 0.782     | 33.100  | 1.300               | 0.578          | 0.804   |
| 19      | 0.846 | 0.817          | 0.438                        | 0.382                             | 0.761     | 32.500  | 1.310               | 0.573          | 0.800   |
| 20      | 0.835 | 0.824          | 0.433                        | 0.389                             | 0.743     | 31.900  | 1.300               | 0.574          | 0.801   |

**Table S4.2.** The statistics of OPLS models with reference YHY and random seed 2

| #       |       |                |                              | R <sup>2</sup> <sub>Scramble</sub> |           |         | RMSE <sub>test</sub> | Q <sup>2</sup> | Pearson- |
|---------|-------|----------------|------------------------------|------------------------------------|-----------|---------|----------------------|----------------|----------|
| Factors | SD    | R <sup>2</sup> | R <sup>2</sup> <sub>cv</sub> |                                    | Stability | F       |                      |                | r        |
| 1       | 1.604 | 0.309          | 0.274                        | 0.041                              | 0.998     | 69.700  | 1.630                | 0.105          | 0.379    |
| 2       | 1.248 | 0.584          | 0.516                        | 0.085                              | 0.993     | 108.800 | 1.400                | 0.334          | 0.617    |
| 3       | 1.139 | 0.656          | 0.571                        | 0.128                              | 0.989     | 97.800  | 1.270                | 0.449          | 0.695    |
| 4       | 1.054 | 0.707          | 0.592                        | 0.172                              | 0.973     | 92.500  | 1.300                | 0.429          | 0.688    |
| 5       | 1.007 | 0.735          | 0.600                        | 0.211                              | 0.960     | 84.100  | 1.240                | 0.481          | 0.716    |

|    |       |       |       |       |       |        |       |       |       |
|----|-------|-------|-------|-------|-------|--------|-------|-------|-------|
| 6  | 0.970 | 0.755 | 0.614 | 0.242 | 0.949 | 77.600 | 1.200 | 0.513 | 0.731 |
| 7  | 0.956 | 0.764 | 0.619 | 0.263 | 0.949 | 69.300 | 1.150 | 0.551 | 0.752 |
| 8  | 0.951 | 0.768 | 0.621 | 0.284 | 0.949 | 61.700 | 1.160 | 0.541 | 0.747 |
| 9  | 0.936 | 0.777 | 0.604 | 0.297 | 0.940 | 57.300 | 1.130 | 0.567 | 0.763 |
| 10 | 0.929 | 0.782 | 0.595 | 0.309 | 0.931 | 52.600 | 1.110 | 0.584 | 0.771 |
| 11 | 0.914 | 0.790 | 0.558 | 0.326 | 0.903 | 49.900 | 1.160 | 0.545 | 0.753 |
| 12 | 0.903 | 0.796 | 0.538 | 0.339 | 0.875 | 47.300 | 1.150 | 0.549 | 0.761 |
| 13 | 0.896 | 0.801 | 0.528 | 0.351 | 0.861 | 44.500 | 1.170 | 0.537 | 0.755 |
| 14 | 0.889 | 0.806 | 0.519 | 0.361 | 0.850 | 42.300 | 1.150 | 0.550 | 0.762 |
| 15 | 0.883 | 0.810 | 0.514 | 0.371 | 0.849 | 40.200 | 1.150 | 0.555 | 0.767 |
| 16 | 0.876 | 0.814 | 0.508 | 0.380 | 0.846 | 38.500 | 1.120 | 0.576 | 0.778 |
| 17 | 0.874 | 0.816 | 0.509 | 0.390 | 0.847 | 36.500 | 1.110 | 0.579 | 0.777 |
| 18 | 0.870 | 0.819 | 0.499 | 0.398 | 0.844 | 34.900 | 1.130 | 0.564 | 0.767 |
| 19 | 0.859 | 0.825 | 0.471 | 0.407 | 0.824 | 34.200 | 1.150 | 0.553 | 0.761 |
| 20 | 0.851 | 0.829 | 0.455 | 0.416 | 0.806 | 33.200 | 1.160 | 0.542 | 0.761 |

**Table S4.3.** The statistics of OPLS models with reference YHY and random seed 3.

| # Factors | SD    | R <sup>2</sup> | R <sup>2</sup> <sub>cv</sub> | R <sup>2</sup> <sub>Scramble</sub> | Stability | F       | RMSE_test | Q <sup>2</sup> | Pearson-r |
|-----------|-------|----------------|------------------------------|------------------------------------|-----------|---------|-----------|----------------|-----------|
| 1         | 1.591 | 0.322          | 0.280                        | 0.045                              | 0.997     | 74.100  | 1.510     | 0.215          | 0.494     |
| 2         | 1.228 | 0.599          | 0.527                        | 0.083                              | 0.992     | 115.700 | 1.350     | 0.372          | 0.667     |
| 3         | 1.157 | 0.646          | 0.565                        | 0.122                              | 0.990     | 93.700  | 1.230     | 0.482          | 0.735     |
| 4         | 1.090 | 0.688          | 0.580                        | 0.159                              | 0.978     | 84.400  | 1.160     | 0.538          | 0.766     |
| 5         | 1.053 | 0.711          | 0.587                        | 0.187                              | 0.967     | 74.600  | 1.180     | 0.519          | 0.769     |
| 6         | 1.024 | 0.728          | 0.597                        | 0.212                              | 0.959     | 67.400  | 1.130     | 0.562          | 0.781     |
| 7         | 1.010 | 0.738          | 0.604                        | 0.229                              | 0.956     | 60.200  | 1.120     | 0.574          | 0.791     |
| 8         | 1.002 | 0.743          | 0.604                        | 0.247                              | 0.956     | 53.900  | 1.150     | 0.547          | 0.778     |
| 9         | 0.993 | 0.750          | 0.603                        | 0.263                              | 0.956     | 49.200  | 1.120     | 0.567          | 0.786     |
| 10        | 0.987 | 0.754          | 0.595                        | 0.277                              | 0.951     | 45.100  | 1.120     | 0.568          | 0.787     |
| 11        | 0.973 | 0.763          | 0.563                        | 0.291                              | 0.931     | 42.600  | 1.130     | 0.565          | 0.795     |
| 12        | 0.970 | 0.766          | 0.553                        | 0.302                              | 0.923     | 39.500  | 1.140     | 0.554          | 0.786     |
| 13        | 0.962 | 0.771          | 0.536                        | 0.313                              | 0.910     | 37.400  | 1.180     | 0.527          | 0.778     |
| 14        | 0.947 | 0.780          | 0.513                        | 0.330                              | 0.886     | 36.200  | 1.200     | 0.508          | 0.770     |
| 15        | 0.931 | 0.789          | 0.489                        | 0.340                              | 0.859     | 35.300  | 1.250     | 0.462          | 0.749     |
| 16        | 0.917 | 0.796          | 0.484                        | 0.351                              | 0.839     | 34.400  | 1.260     | 0.456          | 0.764     |
| 17        | 0.902 | 0.804          | 0.478                        | 0.364                              | 0.817     | 33.800  | 1.240     | 0.470          | 0.771     |
| 18        | 0.889 | 0.811          | 0.499                        | 0.376                              | 0.826     | 33.200  | 1.230     | 0.478          | 0.769     |
| 19        | 0.878 | 0.817          | 0.495                        | 0.389                              | 0.823     | 32.500  | 1.290     | 0.432          | 0.763     |
| 20        | 0.873 | 0.821          | 0.505                        | 0.400                              | 0.831     | 31.400  | 1.350     | 0.377          | 0.748     |

**Table S4.4.** The statistics of OPLS models with reference YHY and random seed 4.

| # Factors | SD | R <sup>2</sup> | R <sup>2</sup> <sub>cv</sub> | R <sup>2</sup> <sub>Scramble</sub> | Stability | F | RMSE_test | Q <sup>2</sup> | Pearson-r |
|-----------|----|----------------|------------------------------|------------------------------------|-----------|---|-----------|----------------|-----------|
|-----------|----|----------------|------------------------------|------------------------------------|-----------|---|-----------|----------------|-----------|

|    |       |       |       |       |       |         |       |       |       |
|----|-------|-------|-------|-------|-------|---------|-------|-------|-------|
| 1  | 1.448 | 0.434 | 0.376 | 0.061 | 0.995 | 119.500 | 1.450 | 0.308 | 0.582 |
| 2  | 1.202 | 0.612 | 0.534 | 0.108 | 0.991 | 122.400 | 1.280 | 0.460 | 0.695 |
| 3  | 1.169 | 0.636 | 0.545 | 0.154 | 0.988 | 89.700  | 1.190 | 0.533 | 0.740 |
| 4  | 1.100 | 0.680 | 0.549 | 0.187 | 0.970 | 81.200  | 1.180 | 0.543 | 0.754 |
| 5  | 1.034 | 0.719 | 0.545 | 0.220 | 0.941 | 77.600  | 1.230 | 0.504 | 0.751 |
| 6  | 0.983 | 0.747 | 0.563 | 0.249 | 0.923 | 74.500  | 1.200 | 0.525 | 0.762 |
| 7  | 0.968 | 0.757 | 0.574 | 0.270 | 0.920 | 66.700  | 1.180 | 0.545 | 0.768 |
| 8  | 0.957 | 0.764 | 0.586 | 0.287 | 0.925 | 60.300  | 1.170 | 0.552 | 0.766 |
| 9  | 0.931 | 0.778 | 0.600 | 0.303 | 0.925 | 57.600  | 1.210 | 0.519 | 0.754 |
| 10 | 0.918 | 0.786 | 0.576 | 0.320 | 0.908 | 53.900  | 1.240 | 0.497 | 0.746 |
| 11 | 0.908 | 0.792 | 0.554 | 0.331 | 0.896 | 50.400  | 1.260 | 0.478 | 0.745 |
| 12 | 0.901 | 0.796 | 0.548 | 0.345 | 0.890 | 47.200  | 1.290 | 0.453 | 0.733 |
| 13 | 0.895 | 0.801 | 0.548 | 0.358 | 0.886 | 44.400  | 1.330 | 0.417 | 0.715 |
| 14 | 0.888 | 0.805 | 0.535 | 0.369 | 0.873 | 42.200  | 1.380 | 0.374 | 0.685 |
| 15 | 0.878 | 0.811 | 0.522 | 0.381 | 0.862 | 40.500  | 1.400 | 0.358 | 0.685 |
| 16 | 0.870 | 0.815 | 0.523 | 0.390 | 0.851 | 38.900  | 1.380 | 0.373 | 0.696 |
| 17 | 0.863 | 0.820 | 0.502 | 0.399 | 0.836 | 37.400  | 1.370 | 0.382 | 0.707 |
| 18 | 0.852 | 0.826 | 0.482 | 0.409 | 0.818 | 36.600  | 1.330 | 0.422 | 0.726 |
| 19 | 0.837 | 0.833 | 0.471 | 0.420 | 0.804 | 36.100  | 1.290 | 0.450 | 0.748 |
| 20 | 0.828 | 0.837 | 0.442 | 0.434 | 0.785 | 35.300  | 1.310 | 0.439 | 0.746 |

**Table S4.5.** The statistics of OPLS models with reference YHY and random seed 5.

| # Factors | SD    | R <sup>2</sup> | R <sup>2</sup> <sub>cv</sub> | R <sup>2</sup> <sub>Scramble</sub> | Stability | F       | RMSE <sub>test</sub> | Q <sup>2</sup> | Pearson-r |
|-----------|-------|----------------|------------------------------|------------------------------------|-----------|---------|----------------------|----------------|-----------|
| 1         | 1.529 | 0.367          | 0.321                        | 0.059                              | 0.997     | 90.500  | 1.610                | 0.157          | 0.445     |
| 2         | 1.251 | 0.579          | 0.510                        | 0.096                              | 0.993     | 106.800 | 1.510                | 0.255          | 0.545     |
| 3         | 1.154 | 0.644          | 0.558                        | 0.136                              | 0.990     | 93.000  | 1.310                | 0.442          | 0.676     |
| 4         | 1.076 | 0.693          | 0.574                        | 0.168                              | 0.976     | 86.200  | 1.230                | 0.506          | 0.728     |
| 5         | 1.051 | 0.709          | 0.588                        | 0.195                              | 0.975     | 74.000  | 1.220                | 0.514          | 0.734     |
| 6         | 0.994 | 0.741          | 0.605                        | 0.223                              | 0.955     | 72.100  | 1.230                | 0.512          | 0.739     |
| 7         | 0.965 | 0.758          | 0.617                        | 0.248                              | 0.949     | 66.900  | 1.210                | 0.526          | 0.740     |
| 8         | 0.957 | 0.763          | 0.623                        | 0.266                              | 0.950     | 60.100  | 1.230                | 0.508          | 0.730     |
| 9         | 0.944 | 0.771          | 0.630                        | 0.283                              | 0.954     | 55.500  | 1.240                | 0.504          | 0.727     |
| 10        | 0.928 | 0.781          | 0.625                        | 0.301                              | 0.952     | 52.300  | 1.250                | 0.493          | 0.715     |
| 11        | 0.912 | 0.789          | 0.608                        | 0.320                              | 0.944     | 49.700  | 1.260                | 0.481          | 0.715     |
| 12        | 0.908 | 0.793          | 0.595                        | 0.332                              | 0.937     | 46.200  | 1.280                | 0.471          | 0.712     |
| 13        | 0.904 | 0.796          | 0.582                        | 0.349                              | 0.928     | 43.100  | 1.290                | 0.459          | 0.707     |
| 14        | 0.894 | 0.802          | 0.559                        | 0.364                              | 0.910     | 41.300  | 1.340                | 0.418          | 0.686     |
| 15        | 0.889 | 0.805          | 0.556                        | 0.375                              | 0.905     | 39.100  | 1.340                | 0.418          | 0.684     |
| 16        | 0.883 | 0.809          | 0.550                        | 0.389                              | 0.901     | 37.400  | 1.300                | 0.450          | 0.700     |
| 17        | 0.870 | 0.816          | 0.534                        | 0.399                              | 0.881     | 36.500  | 1.320                | 0.436          | 0.698     |
| 18        | 0.848 | 0.827          | 0.490                        | 0.411                              | 0.830     | 36.800  | 1.280                | 0.470          | 0.713     |
| 19        | 0.839 | 0.831          | 0.496                        | 0.424                              | 0.832     | 35.800  | 1.270                | 0.474          | 0.716     |

20 0.831 0.836 0.483 0.433 0.825 34.900 1.280 0.469 0.715

**Table S4.6.** The statistics of OPLS models with **reference YRY** and random seed 1

| #<br>Factors | SD    | R <sup>2</sup> | R <sup>2</sup> cv | R <sup>2</sup> _Scramble | Stability | F       | RMSE_test | Q <sup>2</sup> | Pearson-r |
|--------------|-------|----------------|-------------------|--------------------------|-----------|---------|-----------|----------------|-----------|
| 1            | 1.572 | 0.287          | 0.243             | 0.044                    | 0.997     | 62.800  | 1.710     | 0.270          | 0.531     |
| 2            | 1.204 | 0.585          | 0.498             | 0.083                    | 0.987     | 109.100 | 1.470     | 0.459          | 0.687     |
| 3            | 1.122 | 0.641          | 0.543             | 0.126                    | 0.985     | 91.800  | 1.470     | 0.458          | 0.689     |
| 4            | 1.089 | 0.665          | 0.545             | 0.160                    | 0.972     | 75.800  | 1.490     | 0.441          | 0.675     |
| 5            | 0.995 | 0.722          | 0.545             | 0.184                    | 0.921     | 78.800  | 1.610     | 0.348          | 0.612     |
| 6            | 0.962 | 0.741          | 0.552             | 0.212                    | 0.895     | 72.100  | 1.650     | 0.316          | 0.591     |
| 7            | 0.934 | 0.758          | 0.568             | 0.230                    | 0.890     | 67.100  | 1.690     | 0.281          | 0.563     |
| 8            | 0.906 | 0.774          | 0.589             | 0.248                    | 0.872     | 63.800  | 1.680     | 0.292          | 0.578     |
| 9            | 0.897 | 0.780          | 0.582             | 0.263                    | 0.874     | 58.200  | 1.690     | 0.282          | 0.573     |
| 10           | 0.882 | 0.788          | 0.574             | 0.275                    | 0.858     | 54.800  | 1.710     | 0.266          | 0.561     |
| 11           | 0.878 | 0.792          | 0.573             | 0.287                    | 0.855     | 50.400  | 1.710     | 0.264          | 0.559     |
| 12           | 0.862 | 0.801          | 0.568             | 0.301                    | 0.857     | 48.600  | 1.700     | 0.277          | 0.563     |
| 13           | 0.847 | 0.809          | 0.568             | 0.315                    | 0.868     | 46.900  | 1.710     | 0.265          | 0.563     |
| 14           | 0.844 | 0.812          | 0.572             | 0.326                    | 0.866     | 44.000  | 1.710     | 0.265          | 0.567     |
| 15           | 0.840 | 0.815          | 0.567             | 0.334                    | 0.863     | 41.700  | 1.720     | 0.261          | 0.568     |
| 16           | 0.835 | 0.818          | 0.570             | 0.342                    | 0.859     | 39.700  | 1.700     | 0.277          | 0.582     |
| 17           | 0.831 | 0.821          | 0.561             | 0.349                    | 0.841     | 37.800  | 1.670     | 0.302          | 0.595     |
| 18           | 0.829 | 0.823          | 0.556             | 0.355                    | 0.839     | 36.000  | 1.670     | 0.299          | 0.593     |
| 19           | 0.829 | 0.824          | 0.554             | 0.362                    | 0.834     | 34.100  | 1.660     | 0.312          | 0.599     |
| 20           | 0.828 | 0.826          | 0.530             | 0.369                    | 0.819     | 32.600  | 1.660     | 0.313          | 0.601     |

**Table S4.7.** The statistics of OPLS models with **reference YRY** and random seed 2

| #<br>Factors | SD    | R <sup>2</sup> | R <sup>2</sup> cv | R <sup>2</sup> _Scramble | Stability | F       | RMSE_test | Q <sup>2</sup> | Pearson-r |
|--------------|-------|----------------|-------------------|--------------------------|-----------|---------|-----------|----------------|-----------|
| 1            | 1.609 | 0.305          | 0.266             | 0.045                    | 0.998     | 68.400  | 1.620     | 0.115          | 0.389     |
| 2            | 1.244 | 0.587          | 0.498             | 0.082                    | 0.989     | 110.000 | 1.290     | 0.433          | 0.685     |
| 3            | 1.216 | 0.608          | 0.508             | 0.110                    | 0.987     | 79.700  | 1.230     | 0.491          | 0.719     |
| 4            | 1.147 | 0.654          | 0.506             | 0.152                    | 0.967     | 72.200  | 1.270     | 0.457          | 0.697     |
| 5            | 1.104 | 0.681          | 0.492             | 0.181                    | 0.937     | 65.000  | 1.290     | 0.434          | 0.675     |
| 6            | 1.064 | 0.706          | 0.497             | 0.213                    | 0.913     | 60.400  | 1.240     | 0.481          | 0.701     |
| 7            | 1.044 | 0.719          | 0.501             | 0.233                    | 0.899     | 54.700  | 1.180     | 0.528          | 0.731     |
| 8            | 1.014 | 0.736          | 0.474             | 0.253                    | 0.867     | 52.000  | 1.150     | 0.549          | 0.749     |
| 9            | 0.993 | 0.749          | 0.458             | 0.267                    | 0.839     | 49.000  | 1.170     | 0.535          | 0.741     |
| 10           | 0.967 | 0.763          | 0.419             | 0.277                    | 0.776     | 47.400  | 1.100     | 0.589          | 0.772     |
| 11           | 0.946 | 0.775          | 0.353             | 0.287                    | 0.702     | 45.700  | 1.110     | 0.584          | 0.769     |
| 12           | 0.930 | 0.784          | 0.336             | 0.300                    | 0.656     | 43.900  | 1.120     | 0.573          | 0.761     |
| 13           | 0.913 | 0.794          | 0.336             | 0.311                    | 0.627     | 42.600  | 1.100     | 0.592          | 0.773     |
| 14           | 0.893 | 0.804          | 0.334             | 0.320                    | 0.626     | 41.800  | 1.100     | 0.591          | 0.776     |
| 15           | 0.889 | 0.807          | 0.320             | 0.329                    | 0.611     | 39.600  | 1.090     | 0.594          | 0.777     |

|    |       |       |       |       |       |        |       |       |       |
|----|-------|-------|-------|-------|-------|--------|-------|-------|-------|
| 16 | 0.886 | 0.810 | 0.326 | 0.339 | 0.592 | 37.500 | 1.070 | 0.611 | 0.786 |
| 17 | 0.883 | 0.812 | 0.342 | 0.346 | 0.588 | 35.600 | 1.080 | 0.606 | 0.783 |
| 18 | 0.881 | 0.815 | 0.340 | 0.354 | 0.588 | 33.900 | 1.080 | 0.607 | 0.784 |
| 19 | 0.879 | 0.816 | 0.347 | 0.366 | 0.585 | 32.300 | 1.080 | 0.608 | 0.784 |
| 20 | 0.877 | 0.819 | 0.370 | 0.379 | 0.609 | 31.000 | 1.090 | 0.595 | 0.776 |

**Table S4.8.** The statistics of OPLS models with **reference YRY** and random seed 3

| #<br>Factors | SD    | R <sup>2</sup> | R <sup>2</sup> cv | R <sup>2</sup> _Scramble | Stability | F       | RMSE_test | Q <sup>2</sup> | Pearson-r |
|--------------|-------|----------------|-------------------|--------------------------|-----------|---------|-----------|----------------|-----------|
| 1            | 1.624 | 0.293          | 0.250             | 0.050                    | 0.997     | 64.700  | 1.510     | 0.217          | 0.487     |
| 2            | 1.251 | 0.584          | 0.497             | 0.090                    | 0.989     | 108.600 | 1.360     | 0.362          | 0.651     |
| 3            | 1.185 | 0.628          | 0.540             | 0.127                    | 0.988     | 86.800  | 1.310     | 0.407          | 0.699     |
| 4            | 1.136 | 0.661          | 0.544             | 0.175                    | 0.977     | 74.500  | 1.240     | 0.471          | 0.734     |
| 5            | 1.069 | 0.702          | 0.534             | 0.202                    | 0.943     | 71.500  | 1.310     | 0.415          | 0.708     |
| 6            | 1.027 | 0.727          | 0.531             | 0.229                    | 0.915     | 66.900  | 1.270     | 0.445          | 0.715     |
| 7            | 1.003 | 0.741          | 0.543             | 0.248                    | 0.906     | 61.300  | 1.220     | 0.490          | 0.740     |
| 8            | 0.976 | 0.756          | 0.540             | 0.266                    | 0.882     | 57.800  | 1.270     | 0.448          | 0.731     |
| 9            | 0.947 | 0.772          | 0.517             | 0.281                    | 0.848     | 55.700  | 1.300     | 0.423          | 0.707     |
| 10           | 0.915 | 0.789          | 0.486             | 0.297                    | 0.794     | 54.900  | 1.270     | 0.446          | 0.725     |
| 11           | 0.911 | 0.792          | 0.466             | 0.308                    | 0.776     | 50.500  | 1.290     | 0.434          | 0.719     |
| 12           | 0.887 | 0.804          | 0.437             | 0.319                    | 0.736     | 49.600  | 1.290     | 0.432          | 0.728     |
| 13           | 0.869 | 0.813          | 0.429             | 0.329                    | 0.718     | 48.200  | 1.330     | 0.397          | 0.716     |
| 14           | 0.862 | 0.818          | 0.441             | 0.337                    | 0.716     | 45.800  | 1.310     | 0.409          | 0.721     |
| 15           | 0.851 | 0.823          | 0.450             | 0.346                    | 0.689     | 44.100  | 1.280     | 0.438          | 0.730     |
| 16           | 0.846 | 0.827          | 0.443             | 0.357                    | 0.684     | 42.100  | 1.260     | 0.459          | 0.745     |
| 17           | 0.844 | 0.829          | 0.448             | 0.363                    | 0.676     | 39.900  | 1.230     | 0.481          | 0.749     |
| 18           | 0.839 | 0.832          | 0.465             | 0.374                    | 0.702     | 38.200  | 1.230     | 0.482          | 0.748     |
| 19           | 0.835 | 0.835          | 0.465             | 0.384                    | 0.710     | 36.700  | 1.210     | 0.499          | 0.756     |
| 20           | 0.830 | 0.838          | 0.485             | 0.395                    | 0.731     | 35.400  | 1.190     | 0.511          | 0.761     |

**Table S4.9.** The statistics of OPLS models with **reference YRY** and random seed 4

| #<br>Factors | SD    | R <sup>2</sup> | R <sup>2</sup> cv | R <sup>2</sup> _Scramble | Stability | F       | RMSE_test | Q <sup>2</sup> | Pearson-r |
|--------------|-------|----------------|-------------------|--------------------------|-----------|---------|-----------|----------------|-----------|
| 1            | 1.568 | 0.336          | 0.284             | 0.053                    | 0.996     | 79.100  | 1.440     | 0.318          | 0.568     |
| 2            | 1.273 | 0.565          | 0.475             | 0.096                    | 0.990     | 100.800 | 1.170     | 0.547          | 0.742     |
| 3            | 1.236 | 0.593          | 0.485             | 0.135                    | 0.987     | 74.800  | 1.130     | 0.579          | 0.764     |
| 4            | 1.151 | 0.649          | 0.489             | 0.182                    | 0.964     | 70.800  | 1.180     | 0.540          | 0.739     |
| 5            | 1.100 | 0.682          | 0.491             | 0.211                    | 0.943     | 65.200  | 1.180     | 0.542          | 0.741     |
| 6            | 1.054 | 0.710          | 0.505             | 0.236                    | 0.922     | 61.600  | 1.260     | 0.480          | 0.705     |
| 7            | 1.030 | 0.725          | 0.511             | 0.256                    | 0.910     | 56.400  | 1.290     | 0.456          | 0.695     |
| 8            | 1.006 | 0.739          | 0.508             | 0.275                    | 0.899     | 52.700  | 1.240     | 0.492          | 0.717     |
| 9            | 0.987 | 0.751          | 0.512             | 0.289                    | 0.887     | 49.500  | 1.200     | 0.524          | 0.738     |
| 10           | 0.961 | 0.765          | 0.494             | 0.301                    | 0.855     | 47.900  | 1.250     | 0.488          | 0.723     |



|    |       |       |       |       |       |        |       |       |       |
|----|-------|-------|-------|-------|-------|--------|-------|-------|-------|
| 11 | 0.939 | 0.777 | 0.468 | 0.315 | 0.814 | 46.300 | 1.300 | 0.447 | 0.706 |
| 12 | 0.917 | 0.789 | 0.443 | 0.326 | 0.772 | 45.200 | 1.330 | 0.418 | 0.692 |
| 13 | 0.902 | 0.797 | 0.424 | 0.339 | 0.743 | 43.600 | 1.320 | 0.429 | 0.690 |
| 14 | 0.882 | 0.808 | 0.418 | 0.351 | 0.722 | 42.900 | 1.330 | 0.417 | 0.690 |
| 15 | 0.871 | 0.814 | 0.410 | 0.362 | 0.700 | 41.300 | 1.340 | 0.407 | 0.684 |
| 16 | 0.866 | 0.817 | 0.398 | 0.371 | 0.676 | 39.400 | 1.320 | 0.425 | 0.700 |
| 17 | 0.859 | 0.821 | 0.397 | 0.380 | 0.661 | 37.800 | 1.310 | 0.438 | 0.703 |
| 18 | 0.858 | 0.823 | 0.396 | 0.388 | 0.641 | 35.800 | 1.270 | 0.467 | 0.713 |
| 19 | 0.857 | 0.825 | 0.395 | 0.397 | 0.643 | 34.100 | 1.230 | 0.504 | 0.732 |
| 20 | 0.857 | 0.826 | 0.400 | 0.405 | 0.650 | 32.500 | 1.200 | 0.525 | 0.742 |

**Table S4.10.** The statistics of OPLS models with **reference YRY** and random seed 5

| #<br>Factors | SD    | R <sup>2</sup> | R <sup>2</sup> cv | R <sup>2</sup> _Scramble | Stability | F      | RMSE_test | Q <sup>2</sup> | Pearson-<br>r |
|--------------|-------|----------------|-------------------|--------------------------|-----------|--------|-----------|----------------|---------------|
| 1            | 1.516 | 0.378          | 0.326             | 0.053                    | 0.996     | 94.700 | 1.580     | 0.192          | 0.478         |
| 2            | 1.279 | 0.560          | 0.491             | 0.095                    | 0.993     | 98.800 | 1.480     | 0.293          | 0.569         |
| 3            | 1.188 | 0.623          | 0.537             | 0.124                    | 0.990     | 84.700 | 1.270     | 0.473          | 0.696         |
| 4            | 1.083 | 0.689          | 0.509             | 0.159                    | 0.913     | 84.600 | 1.310     | 0.445          | 0.672         |
| 5            | 1.053 | 0.708          | 0.541             | 0.185                    | 0.943     | 73.700 | 1.350     | 0.412          | 0.652         |
| 6            | 1.018 | 0.729          | 0.551             | 0.204                    | 0.931     | 67.500 | 1.320     | 0.438          | 0.672         |
| 7            | 0.998 | 0.741          | 0.568             | 0.224                    | 0.928     | 61.200 | 1.310     | 0.440          | 0.674         |
| 8            | 0.984 | 0.750          | 0.571             | 0.238                    | 0.924     | 55.800 | 1.340     | 0.420          | 0.659         |
| 9            | 0.954 | 0.766          | 0.547             | 0.252                    | 0.901     | 54.000 | 1.330     | 0.424          | 0.659         |
| 10           | 0.937 | 0.776          | 0.542             | 0.264                    | 0.885     | 51.000 | 1.360     | 0.398          | 0.647         |
| 11           | 0.916 | 0.788          | 0.513             | 0.277                    | 0.854     | 49.200 | 1.370     | 0.393          | 0.649         |
| 12           | 0.886 | 0.803          | 0.462             | 0.292                    | 0.783     | 49.200 | 1.390     | 0.374          | 0.641         |
| 13           | 0.870 | 0.811          | 0.464             | 0.306                    | 0.757     | 47.500 | 1.360     | 0.403          | 0.661         |
| 14           | 0.856 | 0.818          | 0.471             | 0.318                    | 0.738     | 46.000 | 1.360     | 0.398          | 0.657         |
| 15           | 0.850 | 0.822          | 0.457             | 0.330                    | 0.724     | 43.800 | 1.350     | 0.406          | 0.659         |
| 16           | 0.846 | 0.825          | 0.473             | 0.343                    | 0.724     | 41.500 | 1.310     | 0.440          | 0.680         |
| 17           | 0.844 | 0.827          | 0.478             | 0.354                    | 0.724     | 39.400 | 1.300     | 0.447          | 0.682         |
| 18           | 0.839 | 0.830          | 0.490             | 0.365                    | 0.727     | 37.800 | 1.290     | 0.457          | 0.688         |
| 19           | 0.833 | 0.834          | 0.498             | 0.376                    | 0.737     | 36.500 | 1.280     | 0.468          | 0.695         |
| 20           | 0.831 | 0.836          | 0.503             | 0.386                    | 0.731     | 34.900 | 1.280     | 0.471          | 0.694         |

**Supplementary 5. Statistics of Tripos-based models with different random seeds.**

**YHY REFERENCE\_SEED 1**

**Determine the optimal number of factors**

**Parameters: CoMFA standard scaling, Leave-one-out, SAMPLS, 20 components**

| Option Name     | Description                                        | Value |
|-----------------|----------------------------------------------------|-------|
| BOOTSTRAPPING   | Number of bootstrap runs to make                   | 0     |
| CENTERING       | Force intercept thru 0.0?                          | NO    |
| COMPONENTS      | Number of components to use                        | 20    |
| CROSSVALIDATION | Number of crossvalidation groups                   | 0     |
| EPSILON         | Convergence criterion                              | 1.e-4 |
| ITERATION       | Maximum number of iterations                       | 100   |
| SCALING_METHOD  | Pre-analysis scaling (COMFA_STD for CoMF COMFA_STD |       |
| XLIST           | Print info about xval groups? NO                   |       |

SAMPLS has finished running. This is NOT a full PLS analysis.  
 Standard Error of Prediction for 20 components:  
 1.426 1.403 1.417 1.434 1.433 1.431 1.441 1.444 1.443 1.431 1.432 1.441 1.450  
 1.484 1.497 1.512 1.530 1.536 1.565 1.589  
 Crossvalidated R2 for 20 components:  
 0.413 0.436 0.428 0.418 0.422 0.428 0.424 0.425 0.430 0.443 0.446 0.443 0.440  
 0.417 0.411 0.404 0.394 0.393 0.374 0.360  
 -- optimum is 0.446 at 11 components  
 #####

**Determine the coefficient of determination (without cross-validation) R<sup>2</sup>**

**Parameters: CoMFA standard scaling, No cross validation, Filtering: 0 kcal, 11 components**

|                            |                                  |                      |
|----------------------------|----------------------------------|----------------------|
| Standard Error of Estimate |                                  | 0.950                |
| R squared                  |                                  | 0.756                |
| F values                   | (n1=11, n2=146)                  | 41.227               |
| Prob.of R <sup>2</sup> =0  | (n1=11, n2=146)                  | 0.000                |
| Relative Contributions     |                                  |                      |
| #                          |                                  | Norm.Coeff. Fraction |
| 1                          | COMSIA_DONOR (1100 vars)         | 2.180 0.275          |
| 2                          | COMSIA_ACCEPTOR (1100 vars)      | 0.831 0.105          |
| 3                          | COMSIA_HYDROPHOBIC (1100 vars)   | 2.654 0.334          |
| 4                          | COMSIA_STERIC (1100 vars)        | 0.519 0.065          |
| 5                          | COMSIA_ELECTROSTATIC (1100 vars) | 1.754 0.221          |
| Summary output             |                                  |                      |
| Standard Error of Estimate |                                  | 0.950                |
| R squared                  |                                  | 0.756                |
| F values                   | (n1=11, n2=146)                  | 41.227               |
| Prob.of R <sup>2</sup> = 0 | (n1=11, n2=146)                  | 0.000                |

**Determine the coefficient of determination due to bootstrapping activity R<sup>2</sup><sub>bst</sub>**

**Parameters: CoMFA standard scaling, Bootstrap 100 runs, Filtering: 0 kcal, 11 components**

|       |                                  |                      |
|-------|----------------------------------|----------------------|
| Means |                                  |                      |
| #     |                                  | Norm.Coeff. Fraction |
| 1     | COMSIA_DONOR (1100 vars)         | 1.911 0.264          |
| 2     | COMSIA_ACCEPTOR (1100 vars)      | 0.779 0.107          |
| 3     | COMSIA_HYDROPHOBIC (1100 vars)   | 2.397 0.331          |
| 4     | COMSIA_STERIC (1100 vars)        | 0.534 0.074          |
| 5     | COMSIA_ELECTROSTATIC (1100 vars) | 1.627 0.225          |

```

Standard Deviations
# -----
1 COMSIA_DONOR (1100 vars)          1.535 0.297
2 COMSIA_ACCEPTOR (1100 vars)      0.623 0.121
3 COMSIA_HYDROPHOBIC (1100 vars)   1.479 0.286
4 COMSIA_STERIC (1100 vars)        0.368 0.071
5 COMSIA_ELECTROSTATIC (1100 vars) 1.159 0.224

```

```

Summary output
Standard Error of Estimate
# -----
6 r_m_Activity      0.781 0.406
R squared
# -----
6 r_m_Activity      0.826 0.052

```

## YHY REFERENCE\_SEED 2

### Determine the optimal number of factors

Parameters: CoMFA standard scaling, Leave-one-out, SAMPLS, 20 components

| Option Name     | Description                                         | Value |
|-----------------|-----------------------------------------------------|-------|
| BOOTSTRAPPING   | Number of bootstrap runs to make                    | 0     |
| CENTERING       | Force intercept thru 0.0?                           | NO    |
| COMPONENTS      | Number of components to use                         | 20    |
| CROSSVALIDATION | Number of crossvalidation groups                    | 0     |
| EPSILON         | Convergence criterion                               | 1.e-4 |
| ITERATION       | Maximum number of iterations                        | 100   |
| SCALING_METHOD  | Pre-analysis scaling (COMFA_STD for CoMF COMFA_STD) |       |
| XLIST           | Print info about xval groups?                       | NO    |

SAMPLS has finished running. This is NOT a full PLS analysis.

Standard Error of Prediction for 20 components:  
1.506 1.442 1.461 1.476 1.491 1.478 1.479 1.464 1.452 1.458 1.462 1.486 1.500  
1.527 1.523 1.540 1.538 1.545 1.559 1.582

Crossvalidated R2 for 20 components:  
0.391 0.445 0.434 0.426 0.418 0.432 0.435 0.450 0.463 0.462 0.462 0.448 0.442  
0.426 0.433 0.425 0.430 0.429 0.423 0.410

-- optimum is 0.463 at 9 components

#####

### Determine the coefficient of determination (without cross validation) R<sup>2</sup>

Parameters: CoMFA standard scaling, No cross validation, Filtering: 0 kcal, 9 components

```

Standard Error of Estimate      0.969
R squared                       0.761
F values      (n1= 9, n2=148)   52.305
Prob.of R2 = 0 (n1= 9, n2=148) 0.000
Relative Contributions
# Norm.Coeff. Fraction
-----
1 COMSIA_DONOR (1100 vars)      1.797 0.281
2 COMSIA_ACCEPTOR (1100 vars)   0.743 0.116
3 COMSIA_HYDROPHOBIC (1100 vars) 2.147 0.336
4 COMSIA_STERIC (1100 vars)     0.420 0.066

```

```

5 COMSIA_ELECTROSTATIC (1100 vars)          1.282 0.201
Summary output
Standard Error of Estimate                    0.969
R squared                                     0.761
F values (n1= 9, n2=148)                    52.305
Prob.of R2 = 0 (n1= 9, n2=148)            0.000

```

**Determine the coefficient of determination due to bootstrapping activity R<sup>2</sup><sub>bst</sub>**

**Parameters: CoMFA standard scaling, Bootstrap 10 runs, Filtering: 0 kcal, 9 components**

Means

```

# Norm.Coeff. Fraction
- -----
1 COMSIA_DONOR (1100 vars)          1.658 0.273
2 COMSIA_ACCEPTOR (1100 vars)      0.692 0.114
3 COMSIA_HYDROPHOBIC (1100 vars)  2.060 0.340
4 COMSIA_STERIC (1100 vars)        0.411 0.068
5 COMSIA_ELECTROSTATIC (1100 vars) 1.245 0.205

```

Standard Deviations

# Norm.Coeff. Fraction

```

- -----
1 COMSIA_DONOR (1100 vars) 1.144 0.267
2 COMSIA_ACCEPTOR (1100 vars) 0.519 0.121
3 COMSIA_HYDROPHOBIC (1100 vars) 1.277 0.298
4 COMSIA_STERIC (1100 vars) 0.305 0.071
5 COMSIA_ELECTROSTATIC (1100 vars) 1.033 0.241

```

Summary output

Standard Error of Estimate

# Mean StdDev

```

- -----
6 r_m_Activity 0.789 0.369

```

R squared

# Mean StdDev

```

- -----
6 r_m_Activity 0.840 0.033

```

**YHY REFERENCE\_SEED 3**

**Determine the optimal number of factors**

**Parameters: CoMFA standard scaling, Leave-one-out, SAMPLS, 20 components**

Option Name Description Value

```

-----
BOOTSTRAPPING Number of bootstrap runs to make          0
CENTERING Force intercept thru 0.0?                     NO
COMPONENTS Number of components to use                  20
CROSSVALIDATION Number of crossvalidation groups        0
EPSILON Convergence criterion                          1.e-4
ITERATION Maximum number of iterations                  100
SCALING_METHOD Pre-analysis scaling (COMFA_STD for CoMF COMFA_STD
XLIST Print info about xval groups?                     NO
SAMPLS has finished running. This is NOT a full PLS analysis.
Standard Error of Prediction for 20 components:
1.497 1.454 1.487 1.506 1.503 1.491 1.468 1.437 1.431 1.455 1.458 1.472 1.488
1.513 1.529 1.518 1.550 1.540 1.559 1.574
Crossvalidated R2 for 20 components:
0.400 0.437 0.415 0.404 0.410 0.423 0.445 0.471 0.480 0.465 0.467 0.461 0.452
0.438 0.430 0.442 0.423 0.434 0.424 0.417

```

-- optimum is 0.48 at 9 components

### Determine the coefficient of determination (without cross validation) $R^2$

**Parameters: CoMFA standard scaling, No cross validation, Filtering: 0 kcal, 9 components**

```
Standard Error of Estimate 0.987
R squared                    0.753
F values                    (n1= 9, n2=148) 50.029
Prob.of R2=0               (n1= 9, n2=148) 0.000
Relative Contributions
#                           Norm.Coeff. Fraction
- -----
1 COMSIA_DONOR (1100 vars)      1.937 0.288
2 COMSIA_ACCEPTOR (1100 vars)   0.690 0.102
3 COMSIA_HYDROPHOBIC (1100 vars) 2.322 0.345
4 COMSIA_STERIC (1100 vars)     0.452 0.067
5 COMSIA_ELECTROSTATIC (1100 vars) 1.328 0.197
Summary output
Standard Error of Estimate      0.987
R squared                       0.753
F values (n1= 9, n2=148)       50.029
Prob.of R2=0 (n1= 9, n2=148)  0.000
```

### Determine the coefficient of determination due to bootstrapping activity $R^2_{bstr}$

**Parameters: CoMFA standard scaling, Bootstrap 10 runs, Filtering: 0 kcal, 9 components**

```
Means
# Norm.Coeff. Fraction
- -----
1 COMSIA_DONOR (1100 vars)      1.628 0.293
2 COMSIA_ACCEPTOR (1100 vars)   0.565 0.102
3 COMSIA_HYDROPHOBIC (1100 vars) 1.942 0.349
4 COMSIA_STERIC (1100 vars)     0.413 0.074
5 COMSIA_ELECTROSTATIC (1100 vars) 1.013 0.182
Standard Deviations
# Norm.Coeff. Fraction
- -----
1 COMSIA_DONOR (1100 vars)      1.136 0.265
2 COMSIA_ACCEPTOR (1100 vars)   0.548 0.128
3 COMSIA_HYDROPHOBIC (1100 vars) 1.260 0.294
4 COMSIA_STERIC (1100 vars)     0.325 0.076
5 COMSIA_ELECTROSTATIC (1100 vars) 1.017 0.237
Summary output
Standard Error of Estimate
# Mean StdDev
- -----
6 r_m_Activity 0.855 0.431
R squared
# Mean StdDev
- -----
6 r_m_Activity 0.809 0.038
```

### YHY REFERENCE\_SEED 4

#### Determine the optimal number of factors

**Parameters: CoMFA standard scaling, Leave-one-out, SAMPLS, 20 components**

```
Option Name Description Value
```

```

-----
BOOTSTRAPPING Number of bootstrap runs to make          0
CENTERING Force intercept thru 0.0?                    NO
COMPONENTS Number of components to use                 20
CROSSVALIDATION Number of crossvalidation groups       0
EPSILON Convergence criterion                          1.e-4
ITERATION Maximum number of iterations                 100
SCALING_METHOD Pre-analysis scaling (COMFA_STD for CoMF COMFA_STD
XLIST Print info about xval groups?                    NO
SAMPLS has finished running. This is NOT a full PLS analysis.
Standard Error of Prediction for 20 components:
1.500 1.476 1.522 1.545 1.530 1.516 1.499 1.465 1.442 1.428 1.430 1.446 1.464
1.480 1.498 1.507 1.520 1.523 1.556 1.559
Crossvalidated R2 for 20 components:
0.392 0.416 0.382 0.368 0.385 0.400 0.417 0.447 0.467 0.481 0.483 0.475 0.466
0.458 0.449 0.446 0.441 0.442 0.422 0.424
-- optimum is 0.483 at 11 components

```

**Determine the coefficient of determination (without cross validation) R<sup>2</sup>**

**Parameters: CoMFA standard scaling, No cross validation, Filtering: 0 kcal, 11 components**

```

Standard Error of Estimate          0.910
R squared                           0.791
F values (n1=11, n2=146)           50.186
Prob.of R2=0 (n1=11, n2=146)       0.000
Relative Contributions
#                                     Norm.Coeff. Fraction

```

```

-----
1 COMSIA_DONOR (1100 vars)          2.400 0.267
2 COMSIA_ACCEPTOR (1100 vars)       0.918 0.102
3 COMSIA_HYDROPHOBIC (1100 vars)    3.078 0.342
4 COMSIA_STERIC (1100 vars)         0.661 0.073
5 COMSIA_ELECTROSTATIC (1100 vars)  1.939 0.216

```

Summary output

```

Standard Error of Estimate          0.910
R squared                           0.791
F values (n1=11, n2=146)           50.186
Prob.of R2=0 (n1=11, n2=146)       0.000

```

**Determine the coefficient of determination due to bootstrapping activity R<sup>2</sup><sub>bstr</sub>**

**Parameters: CoMFA standard scaling, Bootstrap 10 runs, Filtering: 0 kcal, 11 components**

Means

```

# Norm.Coeff. Fraction
-----
1 COMSIA_DONOR (1100 vars)          1.856 0.267
2 COMSIA_ACCEPTOR (1100 vars)       0.704 0.101
3 COMSIA_HYDROPHOBIC (1100 vars)    2.364 0.340
4 COMSIA_STERIC (1100 vars)         0.573 0.082
5 COMSIA_ELECTROSTATIC (1100 vars)  1.463 0.210

```

Standard Deviations

```

# Norm.Coeff. Fraction
-----
1 COMSIA_DONOR (1100 vars)          1.372 0.288
2 COMSIA_ACCEPTOR (1100 vars)       0.585 0.123
3 COMSIA_HYDROPHOBIC (1100 vars)    1.259 0.265
4 COMSIA_STERIC (1100 vars)         0.356 0.075
5 COMSIA_ELECTROSTATIC (1100 vars)  1.187 0.249

```

Summary output

Standard Error of Estimate

```

# Mean StdDev
-----
6 r_m_Activity 0.706 0.336
R squared
# Mean StdDev
-----
6 r_m_Activity 0.873 0.034

```

### YHY REFERENCE\_SEED 5

#### Determine the optimal number of factors

**Parameters: CoMFA standard scaling, Leave-one-out, SAMPLS, 20 components**

```

Option Name Description Value
-----
BOOTSTRAPPING Number of bootstrap runs to make 0
CENTERING Force intercept thru 0.0? NO
COMPONENTS Number of components to use 20
CROSSVALIDATION Number of crossvalidation groups 0
EPSILON Convergence criterion 1.e-4
ITERATION Maximum number of iterations 100
SCALING_METHOD Pre-analysis scaling (COMFA_STD for CoMF COMFA_STD
XLIST Print info about xval groups? NO
SAMPLS has finished running. This is NOT a full PLS analysis.
Standard Error of Prediction for 20 components:
1.485 1.431 1.479 1.497 1.503 1.470 1.464 1.430 1.424 1.422 1.431 1.452 1.471
1.485 1.491 1.497 1.496 1.523 1.549 1.546
Crossvalidated R2 for 20 components:
0.403 0.450 0.416 0.405 0.405 0.434 0.442 0.471 0.479 0.484 0.481 0.470 0.460
0.453 0.453 0.452 0.456 0.441 0.425 0.432
-- optimum is 0.484 at 10 components

```

#### Determine the coefficient of determination (without cross validation) R<sup>2</sup>

**Parameters: CoMFA standard scaling, No cross validation, Filtering: 0 kcal, 9 components**

```

Standard Error of Estimate 0.959
R squared 0.766
F values (n1=10, n2=147) 47.987
Prob.of R2=0 (n1=10, n2=147) 0.000
Relative Contributions
# Norm.Coeff. Fraction
-----
1 COMSIA_DONOR (1100 vars) 1.947 0.263
2 COMSIA_ACCEPTOR (1100 vars) 0.866 0.117
3 COMSIA_HYDROPHOBIC (1100 vars) 2.519 0.340
4 COMSIA_STERIC (1100 vars) 0.518 0.070
5 COMSIA_ELECTROSTATIC (1100 vars) 1.553 0.210
Summary output
Standard Error of Estimate 0.959
R squared 0.766
F values (n1=10, n2=147) 47.987
Prob.of R2=0 (n1=10, n2=147) 0.000

```

#### Determine the coefficient of determination due to bootstrapping activity R<sup>2</sup><sub>bst</sub>

**Parameters: CoMFA standard scaling, Bootstrap 10 runs, Filtering: 0 kcal, 9 components**

```

Means
# Norm.Coeff. Fraction
-----

```

```

1 COMSIA_DONOR (1100 vars)          1.541 0.265
2 COMSIA_ACCEPTOR (1100 vars)       0.670 0.115
3 COMSIA_HYDROPHOBIC (1100 vars)    1.955 0.337
4 COMSIA_STERIC (1100 vars)         0.408 0.070
5 COMSIA_ELECTROSTATIC (1100 vars)  1.234 0.212

```

Standard Deviations

# Norm.Coeff. Fraction

-----

```

1 COMSIA_DONOR (1100 vars)          1.275 0.268
2 COMSIA_ACCEPTOR (1100 vars)       0.597 0.125
3 COMSIA_HYDROPHOBIC (1100 vars)    1.343 0.282
4 COMSIA_STERIC (1100 vars)         0.339 0.071
5 COMSIA_ELECTROSTATIC (1100 vars)  1.210 0.254

```

Summary output

Standard Error of Estimate

# Mean StdDev

-----

```
6 r_m_Activity 0.850 0.344
```

R squared

# Mean StdDev

-----

```
6 r_m_Activity 0.820 0.031
```

## YRY REFERENCE\_SEED 1

### Determine the optimal number of factors

**Parameters: CoMFA standard scaling, Leave-one-out, SAMPLS, 20 components**

| Option Name                                                   | Description                                    | Value                                                             |
|---------------------------------------------------------------|------------------------------------------------|-------------------------------------------------------------------|
| BOOTSTRAPPING                                                 | Number of bootstrap runs to make               | 0                                                                 |
| CENTERING                                                     | Force intercept thru 0.0?                      | NO                                                                |
| COMPONENTS                                                    | Number of components to use                    | 20                                                                |
| CROSSVALIDATION                                               | Number of crossvalidation groups               | 0                                                                 |
| EPSILON                                                       | Convergence criterion                          | 1.e-4                                                             |
| ITERATION                                                     | Maximum number of iterations                   | 100                                                               |
| SCALING_METHOD                                                | Pre-analysis scaling (COMFA_STD for COMFA_STD) |                                                                   |
| XLIST                                                         | Print info about xval groups?                  | NO                                                                |
| SAMPLS has finished running. This is NOT a full PLS analysis. |                                                |                                                                   |
| XLIST                                                         | Print info about xval groups?                  | NO                                                                |
| SAMPLS has finished running. This is NOT a full PLS analysis. |                                                |                                                                   |
| Standard Error of Prediction for 20 components:               |                                                |                                                                   |
| 1.494                                                         | 1.408                                          | 1.478 1.398 1.420 1.378 1.363 1.365 1.353 1.341 1.337 1.325 1.335 |
| 1.333                                                         | 1.357                                          | 1.343 1.350 1.350 1.366 1.383                                     |
| Crossvalidated R2 for 20 components:                          |                                                |                                                                   |
| 0.356                                                         | 0.432                                          | 0.378 0.447 0.433 0.470 0.484 0.486 0.499 0.511 0.518 0.529 0.525 |
| 0.530                                                         | 0.516                                          | 0.530 0.528 0.531 0.524 0.515                                     |
| -- optimum is 0.531 at 18 components                          |                                                |                                                                   |

### Determine the coefficient of determination (without cross-validation) R<sup>2</sup>

**Parameters: CoMFA standard scaling, No cross validation, Filtering: 0 kcal, 18 components**

Relative Contributions

# Norm.Coeff. Fraction

-----

```
1 COMSIA_DONOR (1296 vars)          0.629 0.217
```



```

2 COMSIA_ACCEPTOR (1296 vars)      0.385 0.133
3 COMSIA_HYDROPHOBIC (1296 vars)   1.042 0.359
4 COMSIA_STERIC (1296 vars)        0.204 0.070
5 COMSIA_ELECTROSTATIC (1296 vars)  0.644 0.222
Summary output
Standard Error of Estimate          1.116
R squared                            0.636
F values (n1= 3, n2=153)           89.301
Prob.of R2=0(n1= 3, n2=153)       0.000

```

**Determine the coefficient of determination due to bootstrapping activity  $R^2_{bstr}$**

**Parameters: CoMFA standard scaling, Bootstrap 100 runs, Filtering: 0 kcal, 18 components**

Means

```

#                               Norm.Coeff. Fraction
- -----
1 COMSIA_DONOR (1296 vars)      0.597 0.211
2 COMSIA_ACCEPTOR (1296 vars)   0.375 0.133
3 COMSIA_HYDROPHOBIC (1296 vars) 1.013 0.358
4 COMSIA_STERIC (1296 vars)     0.201 0.071
5 COMSIA_ELECTROSTATIC (1296 vars) 0.641 0.227

```

Standard Deviations

```

#                               Norm.Coeff. Fraction
- -----
1 COMSIA_DONOR (1296 vars)      0.358 0.269
2 COMSIA_ACCEPTOR (1296 vars)   0.191 0.144
3 COMSIA_HYDROPHOBIC (1296 vars) 0.366 0.275
4 COMSIA_STERIC (1296 vars)     0.095 0.071
5 COMSIA_ELECTROSTATIC (1296 vars) 0.319 0.240

```

Summary output

```

Standard Error of Estimate
#                               Mean StdDev
- -----
1 R_USER_ACTIVITY              1.029 0.372
R squared
#                               Mean StdDev
- -----
1 R_USER_ACTIVITY              0.684 0.051

```

**YRY REFERENCE\_SEED 2**

**Determine the optimal number of factors**

**Parameters: CoMFA standard scaling, Leave-one-out, SAMPLS, 15 components**

```

Option Name Description Value
-----
BOOTSTRAPPING Number of bootstrap runs to make 0
CENTERING Force intercept thru 0.0? NO
COMPONENTS Number of components to use 15
CROSSVALIDATION Number of crossvalidation groups 0
EPSILON Convergence criterion 1.e-4
ITERATION Maximum number of iterations 100
SCALING_METHOD Pre-analysis scaling (COMFA_STD for CoMF COMFA_STD
XLIST Print info about xval groups? NO
SAMPLS has finished running. This is NOT a full PLS analysis.
Standard Error of Prediction for 15 components:

```

1.556 1.473 1.479 1.503 1.519 1.520 1.532 1.553 1.557 1.579 1.602 1.610 1.613  
 1.629 1.625  
 Crossvalidated R2 for 15 components:  
 0.350 0.421 0.420 0.405 0.396 0.399 0.394 0.381 0.382 0.369 0.354 0.353 0.355  
 0.347 0.354  
 -- optimum is 0.421 at 2 components

**Determine the coefficient of determination (without cross-validation) R<sup>2</sup>**

**Parameters: CoMFA standard scaling, No cross validation, Filtering: 0 kcal, 2 components**

|                                    |                      |
|------------------------------------|----------------------|
| Standard Error of Estimate         | 1.325                |
| R squared                          | 0.531                |
| F values ( n1= 2, n2=155 )         | 87.797               |
| Prob.of R2=0 ( n1= 2, n2=155 )     | 0.000                |
| Relative Contributions             |                      |
| #                                  | Norm.Coeff. Fraction |
| - -----                            |                      |
| 1 COMSIA_DONOR (1152 vars)         | 0.440 0.196          |
| 2 COMSIA_ACCEPTOR (1152 vars)      | 0.333 0.148          |
| 3 COMSIA_HYDROPHOBIC (1152 vars)   | 0.744 0.330          |
| 4 COMSIA_STERIC (1152 vars)        | 0.146 0.065          |
| 5 COMSIA_ELECTROSTATIC (1152 vars) | 0.589 0.262          |
| Summary output                     |                      |
| Standard Error of Estimate         | 1.325                |
| R squared                          | 0.531                |
| F values (n1= 2, n2=155)           | 87.797               |
| Prob.of R2=0 ( n1= 2, n2=155 )     | 0.000                |

**Determine the coefficient of determination due to bootstrapping activity R<sup>2</sup><sub>bst</sub>**

**Parameters: CoMFA standard scaling, Bootstrap 100 runs, Filtering: 0 kcal, 2 components**

|                                    |                      |
|------------------------------------|----------------------|
| Means                              |                      |
| #                                  | Norm.Coeff. Fraction |
| - -----                            |                      |
| 1 COMSIA_DONOR (1152 vars)         | 0.441 0.197          |
| 2 COMSIA_ACCEPTOR (1152 vars)      | 0.324 0.145          |
| 3 COMSIA_HYDROPHOBIC (1152 vars)   | 0.749 0.334          |
| 4 COMSIA_STERIC (1152 vars)        | 0.146 0.065          |
| 5 COMSIA_ELECTROSTATIC (1152 vars) | 0.580 0.259          |
| Standard Deviations                |                      |
| #                                  | Norm.Coeff. Fraction |
| - -----                            |                      |
| 1 COMSIA_DONOR (1152 vars)         | 0.268 0.260          |
| 2 COMSIA_ACCEPTOR (1152 vars)      | 0.154 0.149          |
| 3 COMSIA_HYDROPHOBIC (1152 vars)   | 0.279 0.270          |
| 4 COMSIA_STERIC (1152 vars)        | 0.078 0.075          |
| 5 COMSIA_ELECTROSTATIC (1152 vars) | 0.253 0.245          |
| Summary output                     |                      |
| Standard Error of Estimate         |                      |
| # Mean StdDev                      |                      |
| - -----                            |                      |
| 6 r_m_Activity                     | 1.250 0.492          |
| R squared                          |                      |
| # Mean StdDev                      |                      |
| - -----                            |                      |
| 6 r_m_Activity                     | 0.583 0.041          |

**YRY REFERENCE\_SEED 3**

### Determine the optimal number of factors

Parameters: CoMFA standard scaling, Leave-one-out, SAMPLS, 20 components

```
Option Name Description Value
-----
BOOTSTRAPPING Number of bootstrap runs to make 0
CENTERING Force intercept thru 0.0? NO
COMPONENTS Number of components to use 20
CROSSVALIDATION Number of crossvalidation groups 0
EPSILON Convergence criterion 1.e-4
ITERATION Maximum number of iterations 100
SCALING_METHOD Pre-analysis scaling (COMFA_STD for CoMF COMFA_STD
XLIST Print info about xval groups? NO
SAMPLS has finished running. This is NOT a full PLS analysis.
Standard Error of Prediction for 20 components:
1.556 1.475 1.473 1.491 1.490 1.476 1.481 1.498 1.486 1.507 1.514 1.502 1.519
1.530 1.491 1.493 1.493 1.507 1.512 1.516
Crossvalidated R2 for 20 components:
0.352 0.421 0.426 0.416 0.421 0.435 0.435 0.426 0.439 0.427 0.425 0.439 0.429
0.425 0.458 0.461 0.464 0.458 0.458 0.459
-- optimum is 0.464 at 17 components
```

### Determine the coefficient of determination (without cross-validation) R<sup>2</sup>

Parameters: CoMFA standard scaling, No cross validation, Filtering: 0 kcal, 17 components

```
Standard Error of Estimate 0.825
R squared 0.837
F values ( n1=17, n2=140 ) 42.148
Prob.of R2=0 ( n1=17, n2=140 ) 0.000
Relative Contributions
# Norm.Coeff. Fraction
- -----
1 COMSIA_DONOR (1296 vars) 2.843 0.261
2 COMSIA_ACCEPTOR (1296 vars) 1.493 0.137
3 COMSIA_HYDROPHOBIC (1296 vars) 3.734 0.342
4 COMSIA_STERIC (1296 vars) 0.887 0.081
5 COMSIA_ELECTROSTATIC (1296 vars) 1.947 0.179
Summary Output
Standard Error of Estimate 0.825
R squared 0.837
F values ( n1=17, n2=140 ) 42.148
Prob.of R2=0 ( n1=17, n2=140 ) 0.000
```

### Determine the coefficient of determination due to bootstrapping activity R<sup>2</sup><sub>bst</sub>

Parameters: CoMFA standard scaling, Bootstrap 100 runs, Filtering: 0 kcal, 17 components

```
Means
# Norm.Coeff. Fraction
- -----
1 COMSIA_DONOR (1296 vars) 2.253 0.246
2 COMSIA_ACCEPTOR (1296 vars) 1.174 0.128
3 COMSIA_HYDROPHOBIC (1296 vars) 3.265 0.356
4 COMSIA_STERIC (1296 vars) 0.834 0.091
5 COMSIA_ELECTROSTATIC (1296 vars) 1.646 0.179
Standard Deviations
# Norm.Coeff. Fraction
- -----
1 COMSIA_DONOR (1296 vars) 2.258 0.303
2 COMSIA_ACCEPTOR (1296 vars) 0.992 0.133
```

```

3 COMSIA_HYDROPHOBIC (1296 vars)          1.967 0.264
4 COMSIA_STERIC (1296 vars)              0.638 0.086
5 COMSIA_ELECTROSTATIC (1296 vars)       1.601 0.215
Summary output
Standard Error of Estimate
# Mean StdDev
- -----
6 r_m_Activity 0.700 0.282
R squared
# Mean StdDev
- -----
6 r_m_Activity 0.879 0.026

```

#### YRY REFERENCE\_SEED 4

##### Determine the optimal number of factors

**Parameters: CoMFA standard scaling, Leave-one-out, SAMPLS, 20 components**

```

Option Name Description Value
-----
BOOTSTRAPPING Number of bootstrap runs to make 1          00
CENTERING Force intercept thru 0.0?                NO
COMPONENTS Number of components to use             20
CROSSVALIDATION Number of crossvalidation groups    0
EPSILON Convergence criterion                     1.e-4
ITERATION Maximum number of iterations             100
SCALING_METHOD Pre-analysis scaling (COMFA_STD for CoMF COMFA_STD
XLIST Print info about xval groups?                NO
SAMPLS has finished running. This is NOT a full PLS analysis.
Standard Error of Prediction for 20 components:
1.567 1.506 1.492 1.513 1.498 1.486 1.488 1.498 1.503 1.499 1.538 1.536 1.528
1.554 1.543 1.541 1.534 1.539 1.565 1.573
Crossvalidated R2 for 20 components:
0.337 0.392 0.406 0.394 0.410 0.423 0.426 0.422 0.422 0.429 0.403 0.408 0.418
0.402 0.415 0.420 0.430 0.431 0.415 0.414
-- optimum is 0.431 at 18 components

```

##### Determine the coefficient of determination (without cross-validation) R<sup>2</sup>

**Parameters: CoMFA standard scaling, No cross validation, Filtering: 0 kcal, 18 components**

```

Standard Error of Estimate 0.847
R squared 0.827
F values ( n1=18, n2=139 ) 36.988
Prob.of R2=0 (n1=18, n2=139 ) 0.000
Relative Contributions
# Norm.Coeff. Fraction
- -----
1 COMSIA_DONOR (1152 vars) 2.768 0.259
2 COMSIA_ACCEPTOR (1152 vars) 1.495 0.140
3 COMSIA_HYDROPHOBIC (1152 vars) 3.633 0.340
4 COMSIA_STERIC (1152 vars) 0.892 0.084
5 COMSIA_ELECTROSTATIC (1152 vars) 1.887 0.177
Summary output
Standard Error of Estimate 0.847
R squared 0.827
F values (n1=18, n2=139 ) 36.988
Prob.of R2=0 (n1=18, n2=139 ) 0.000

```

**Determine the coefficient of determination due to bootstrapping activity  $R^2_{bstr}$**

**Parameters: CoMFA standard scaling, Bootstrap 10 runs, Filtering: 0 kcal, 18 components**

Means

```
#                               Norm.Coeff. Fraction
- -----
1 COMSIA_DONOR (1152 vars)      2.265 0.243
2 COMSIA_ACCEPTOR (1152 vars)  1.230 0.132
3 COMSIA_HYDROPHOBIC (1152 vars) 3.398 0.365
4 COMSIA_STERIC (1152 vars)    0.813 0.087
5 COMSIA_ELECTROSTATIC (1152 vars) 1.614 0.173
```

Standard Deviations

```
#                               Norm.Coeff. Fraction
- -----
1 COMSIA_DONOR (1152 vars)      2.323 0.311
2 COMSIA_ACCEPTOR (1152 vars)  0.974 0.130
3 COMSIA_HYDROPHOBIC (1152 vars) 1.993 0.267
4 COMSIA_STERIC (1152 vars)    0.661 0.089
5 COMSIA_ELECTROSTATIC (1152 vars) 1.517 0.203
```

Summary output

Standard Error of Estimate

```
# Mean StdDev
```

```
- -----
6 r_m_Activity 0.697 0.259
```

R squared

```
# Mean StdDev
```

```
- -----
6 r_m_Activity 0.881 0.022
```

**YRY REFERENCE\_SEED 5**

**Determine the optimal number of factors**

**Parameters: CoMFA standard scaling, Leave-one-out, SAMPLS, 20 components**

Option Name Description Value

```
-----
BOOTSTRAPPING Number of bootstrap runs to make 0
CENTERING Force intercept thru 0.0? NO
COMPONENTS Number of components to use 20
CROSSVALIDATION Number of crossvalidation groups 0
EPSILON Convergence criterion 1.e-4
ITERATION Maximum number of iterations 100
SCALING_METHOD Pre-analysis scaling (COMFA_STD for CoMF COMFA_STD
XLIST Print info about xval groups? NO
SAMPLS has finished running. This is NOT a full PLS analysis.
Standard Error of Prediction for 20 components:
1.539 1.464 1.461 1.476 1.482 1.461 1.467 1.464 1.461 1.465 1.501 1.484 1.506
1.493 1.497 1.486 1.492 1.490 1.502 1.518
Crossvalidated R2 for 20 components:
0.359 0.424 0.430 0.421 0.421 0.441 0.440 0.446 0.452 0.453 0.429 0.446 0.433
0.447 0.448 0.460 0.459 0.465 0.460 0.453
-- optimum is 0.465 at 18 components
```

**Determine the coefficient of determination (without cross-validation)  $R^2$**

**Parameters: CoMFA standard scaling, No cross validation, Filtering: 0 kcal, 18 components**

|                              |        |
|------------------------------|--------|
| Standard Error of Estimate   | 0.836  |
| R squared                    | 0.831  |
| F values (n1=18, n2=139)     | 38.077 |
| Prob.of R2=0 (n1=18, n2=139) | 0.000  |

Relative Contributions

| # |                                  | Norm.Coeff. | Fraction |
|---|----------------------------------|-------------|----------|
| 1 | COMSIA_DONOR (1296 vars)         | 2.681       | 0.255    |
| 2 | COMSIA_ACCEPTOR (1296 vars)      | 1.450       | 0.138    |
| 3 | COMSIA_HYDROPHOBIC (1296 vars)   | 3.581       | 0.340    |
| 4 | COMSIA_STERIC (1296 vars)        | 0.888       | 0.084    |
| 5 | COMSIA_ELECTROSTATIC (1296 vars) | 1.934       | 0.184    |

**Determine the coefficient of determination due to bootstrapping activity  $R^2_{bstr}$**

**Parameters: CoMFA standard scaling, Bootstrap 10 runs, Filtering: 0 kcal, 18 components**

Means

| # |                                  | Norm.Coeff. | Fraction |
|---|----------------------------------|-------------|----------|
| 1 | COMSIA_DONOR (1296 vars)         | 2.045       | 0.236    |
| 2 | COMSIA_ACCEPTOR (1296 vars)      | 1.109       | 0.128    |
| 3 | COMSIA_HYDROPHOBIC (1296 vars)   | 3.120       | 0.361    |
| 4 | COMSIA_STERIC (1296 vars)        | 0.812       | 0.094    |
| 5 | COMSIA_ELECTROSTATIC (1296 vars) | 1.566       | 0.181    |

Standard Deviations

| # |                                  | Norm.Coeff. | Fraction |
|---|----------------------------------|-------------|----------|
| 1 | COMSIA_DONOR (1296 vars)         | 2.246       | 0.304    |
| 2 | COMSIA_ACCEPTOR (1296 vars)      | 0.933       | 0.126    |
| 3 | COMSIA_HYDROPHOBIC (1296 vars)   | 1.954       | 0.265    |
| 4 | COMSIA_STERIC (1296 vars)        | 0.637       | 0.086    |
| 5 | COMSIA_ELECTROSTATIC (1296 vars) | 1.613       | 0.219    |

Summary output

Standard Error of Estimate

# Mean StdDev

6 r\_m\_Activity 0.713 0.233

R squared

# Mean StdDev

6 r\_m\_Activity 0.865 0.020

**Supplementary 6.** Observed vs. predicted FTC values derived from OPLS, Tripos-based models and GBR model.

| OPLS-based models |           |                |           | Tripos-based models |           |                |           | RFE-GBR  |           |
|-------------------|-----------|----------------|-----------|---------------------|-----------|----------------|-----------|----------|-----------|
| YHY ref_seed 1    |           | YRY ref_seed 1 |           | YHY ref_seed 1      |           | YRY ref_seed 1 |           | Observed | Predicted |
| Observed          | Predicted | Observed       | Predicted | Observed            | Predicted | Observed       | Predicted | Observed | Predicted |
| 3.918             | 4.568     | 3.918          | 4.201     | 3.918               | 4.720     | 3.918          | 4.475     | 1.313    | 2.025     |
| 6.697             | 4.482     | 6.697          | 4.143     | 6.697               | 5.015     | 6.697          | 5.010     | 1.320    | 2.884     |
| 4.504             | 4.537     | 4.504          | 4.079     | 4.504               | 3.675     | 4.504          | 3.498     | 2.233    | 2.111     |
| 4.136             | 4.095     | 4.136          | 4.044     | 4.136               | 3.979     | 4.136          | 3.963     | 1.091    | 1.434     |
| 5.584             | 5.276     | 5.584          | 4.833     | 5.584               | 5.773     | 5.584          | 5.448     | 2.505    | 1.802     |
| 1.313             | 1.670     | 5.197          | 4.441     | 1.313               | 2.342     | 5.197          | 5.179     | 5.197    | 4.814     |
| 5.197             | 4.468     | 6.061          | 4.699     | 5.197               | 5.018     | 6.061          | 4.872     | 1.192    | 1.971     |
| 6.061             | 4.826     | 1.396          | 1.474     | 6.061               | 4.298     | 1.396          | 1.621     | 9.886    | 7.256     |
| 1.396             | 1.658     | 1.096          | 1.689     | 1.396               | 2.083     | 1.096          | 0.995     | 3.378    | 3.994     |
| 1.096             | 1.421     | 2.598          | 2.063     | 1.096               | 1.245     | 2.598          | 2.053     | 3.417    | 2.478     |
| 1.184             | 0.923     | 3.378          | 4.211     | 1.184               | 1.697     | 3.378          | 4.449     | 4.136    | 4.408     |
| 0.407             | 1.505     | 0.904          | 2.198     | 0.407               | 1.175     | 0.904          | 2.764     | 0.808    | 1.910     |
| 2.598             | 2.431     | 1.803          | 3.922     | 2.598               | 3.065     | 1.803          | 3.462     | 2.026    | 0.984     |
| 3.378             | 4.640     | 0.937          | 2.488     | 3.378               | 4.418     | 0.937          | -0.629    | 2.020    | 1.343     |
| 3.212             | 1.303     | 5.303          | 4.104     | 3.212               | 1.373     | 5.303          | 4.479     | 0.905    | 2.129     |
| 0.727             | 1.305     | 3.344          | 3.626     | 0.727               | 0.655     | 3.344          | 3.849     | 5.311    | 4.244     |
| 0.808             | 1.117     | 3.983          | 3.760     | 0.808               | 0.687     | 3.983          | 4.012     | 4.227    | 4.185     |
| 2.707             | 2.621     | 1.313          | 1.429     | 2.707               | 3.039     | 1.313          | 2.284     | 6.791    | 5.601     |
| 0.905             | 2.078     | 2.02           | 1.818     | 0.905               | 2.499     | 2.02           | 2.019     | 4.302    | 4.370     |
| 2.020             | 2.065     | 3.071          | 3.971     | 2.02                | 2.423     | 3.071          | 5.591     | 3.607    | 2.395     |
| 1.803             | 2.506     | 3.071          | 3.590     | 1.803               | 3.301     | 3.071          | 3.563     | 1.394    | 1.733     |
| 0.937             | 2.100     | 5.071          | 1.782     | 0.937               | 0.881     | 5.071          | 1.794     | 0.188    | 1.260     |
| 1.477             | 0.554     | 3.212          | 1.253     | 1.477               | 0.610     | 3.212          | 1.307     | 1.096    | 1.601     |
| 0.952             | 0.503     | 0.727          | 0.896     | 0.952               | 0.757     | 0.727          | 0.255     | 0.727    | 0.670     |
| 2.026             | 0.228     | 0.808          | 1.374     | 2.026               | -0.304    | 0.808          | 1.431     | 1.089    | 1.766     |
| 0.188             | 2.368     | 2.707          | 2.787     | 0.188               | 2.037     | 2.707          | 2.757     | 6.152    | 4.637     |
| 3.612             | 3.524     | 3.607          | 3.548     | 3.612               | 5.030     | 3.607          | 3.399     | 3.047    | 3.191     |
| 3.071             | 3.306     | 1.184          | 1.576     | 3.071               | 3.680     | 1.184          | 2.236     | 3.718    | 3.911     |
| 3.071             | 4.161     | 2.233          | 1.841     | 3.071               | 4.873     | 2.233          | 1.175     | 1.803    | 1.986     |
| 1.911             | 2.974     | 3.447          | 3.226     | 1.911               | 3.945     | 3.447          | 3.395     | 3.366    | 3.782     |
| 5.071             | 2.343     | 9.886          | 4.061     | 5.071               | 2.016     | 9.886          | 3.374     | 6.697    | 4.366     |
| 9.886             | 5.737     | 1.911          | 2.929     | 9.886               | 5.839     | 1.911          | 3.518     | 3.607    | 2.487     |
| 3.607             | 3.394     | 0.188          | 2.276     | 3.607               | 3.473     | 0.188          | 1.912     | 2.996    | 3.527     |
| 2.233             | 1.880     | 3.612          | 2.246     | 2.233               | 1.565     | 3.612          | 0.932     | 2.384    | 1.835     |
| 3.447             | 3.613     | 2.996          | 3.359     | 3.447               | 3.542     | 2.996          | 4.350     | 4.116    | 3.734     |
| 5.303             | 3.530     | 0.407          | 2.135     | 5.303               | 3.823     | 0.407          | 1.449     | 1.320    | 3.469     |
| 3.344             | 3.433     | 1.477          | 0.711     | 3.344               | 4.011     | 1.477          | 0.980     | 3.344    | 3.603     |
| 2.996             | 3.095     | 0.952          | 0.722     | 2.996               | 3.088     | 0.952          | 1.325     | 2.996    | 3.339     |
| 3.983             | 3.314     | 2.026          | 0.746     | 3.983               | 2.273     | 2.026          | 0.251     | 0.606    | 1.732     |

## **Supplementary 7.**

**Table S7.1.** Five CoMSIA interaction fields from 13 Tryptophyllin peptides.

Table S7.1 can be found at: [https://docs.google.com/spreadsheets/d/1YOqhC-kpOeS\\_yjLj2ngXLzDuYDIQl4S/edit?usp=sharing&ouid=106421106263255583273&rtpof=true&sd=true](https://docs.google.com/spreadsheets/d/1YOqhC-kpOeS_yjLj2ngXLzDuYDIQl4S/edit?usp=sharing&ouid=106421106263255583273&rtpof=true&sd=true)

## **Script S1- 6.**

Script S1-6 can be found at

<https://drive.google.com/drive/folders/1vdrckX9X1GjO3MTsCyV7At1yyc0PGaBG?usp=sharing>
